# Supplementary material
Source: PubMed Central journal article supplement (PMC6583547)
Supplement: jamaophthalmol-135-1401-s001.pdf [file jamaophthalmol-135-1401-s001.pdf]

1 **Effect of Corneal Preservation Time on Long-Term Graft Success**  
2 **Cornea Preservation Time Study (CPTS)**  
3 **Protocol**

4  
5 Version 4.0  
6 July 1, 2015  
7

8 Study Chair: Jonathan Lass MD  
9 Department of Ophthalmology & Visual Sciences  
10 Case Western Reserve University  
11 University Hospitals Eye Institute  
12 11100 Euclid Ave; 4129 Lakeside  
13 Cleveland, OH 44106  
14

15 Data Management and Analysis Center (DMAC):  
16 Director: Allison Edwards MS  
17 Jaeb Center for Health Research  
18 15310 Amberly Drive, Suite 350  
19 Tampa, FL 33647  
20

21 Coordinating Center (CC):  
22 Director: Loretta Szczotka-Flynn OD, PhD  
23 Department of Ophthalmology & Visual Sciences  
24 Vision Research Coordinating Center  
25 Case Western Reserve University  
26 University Hospitals Eye Institute  
27 11100 Euclid Ave; 4126 Lakeside  
28 Cleveland, OH 44106  
29

30 Cornea Image Analysis Reading Center (CIARC):  
31 Director: Beth Ann Benetz, M.A.  
32 Department of Ophthalmology & Visual Sciences  
33 Case Western Reserve University  
34 University Hospitals Eye Institute  
35 11100 Euclid Ave; Wearn 646  
36 Cleveland, OH 44106  
37  
38  
39

## TABLE OF CONTENTS

|    |                                                                    |    |
|----|--------------------------------------------------------------------|----|
| 41 | <b><u>CHAPTER 1. BACKGROUND AND RATIONALE</u></b>                  | 4  |
| 42 | <b>1.1. BACKGROUND</b>                                             | 4  |
| 43 | 1.1.1 STUDIES OF PRESERVATION TIME                                 | 5  |
| 44 | <b>1.2. RATIONALE</b>                                              | 6  |
| 45 | <b>1.3. STUDY OBJECTIVES</b>                                       | 7  |
| 46 | <b>1.4. SYNOPSIS OF STUDY DESIGN</b>                               | 7  |
| 47 | 1.4.1. STUDY DESIGN                                                | 7  |
| 48 | 1.4.2. MAJOR ELIGIBILITY CRITERIA                                  | 7  |
| 49 | 1.4.2.1. STUDY PARTICIPANTS                                        | 7  |
| 50 | 1.4.2.2. DONOR CORNEAS                                             | 8  |
| 51 | 1.4.2.3. TREATMENT GROUPS                                          | 8  |
| 52 | 1.4.2.4. SAMPLE SIZE                                               | 8  |
| 53 | 1.4.2.5. VISIT SCHEDULE AND PROCEDURES                             | 8  |
| 54 | 1.4.2.6. OUTCOMES                                                  | 9  |
| 55 | <b>1.5. GENERAL CONSIDERATIONS</b>                                 | 9  |
| 56 |                                                                    |    |
| 57 | <b><u>CHAPTER 2. ELIGIBILITY AND ENROLLMENT CLINICAL SITES</u></b> | 10 |
| 58 | <b>2.1. ELIGIBILITY ASSESSMENT</b>                                 | 10 |
| 59 | <b>2.2. ELIGIBILITY CRITERIA</b>                                   | 10 |
| 60 | 2.2.1. STUDY PARTICIPANT ELIGIBILITY CRITERIA                      | 10 |
| 61 | 2.2.1.1 STUDY PARTICIPANT INCLUSION CRITERIA                       | 10 |
| 62 | 2.2.1.2 STUDY PARTICIPANT EXCLUSION CRITERIA                       | 10 |
| 63 | 2.2.2. STUDY EYE INCLUSION CRITERIA                                | 10 |
| 64 | 2.2.3. STUDY EYE EXCLUSION CRITERIA                                | 11 |
| 65 | <b>2.3. ELIGIBILITY CRITERIA FOR SECOND STUDY EYE</b>              | 11 |
| 66 | <b>2.4. SCREENING EVALUATION AND BASELINE TESTING</b>              | 11 |
| 67 | 2.4.1. HISTORICAL INFORMATION                                      | 11 |
| 68 | 2.4.2. BASELINE TESTING                                            | 12 |
| 69 | <b>2.5. SUBJECT ENROLLMENT</b>                                     | 12 |
| 70 | <b>2.6. RANDOMIZATION</b>                                          | 12 |
| 71 |                                                                    |    |
| 72 | <b><u>CHAPTER 3. DONOR ELIGIBILITY AND CORNEA ASSIGNMENT</u></b>   |    |
| 73 | <b><u>EYE BANKS</u></b>                                            | 13 |
| 74 |                                                                    |    |
| 75 | <b>3.1. EYE BANK PROCEDURES</b>                                    | 13 |
| 76 | 3.1.1. DONOR ELIGIBILITY                                           | 13 |
| 77 | 3.1.2. ASSIGNMENT OF DONOR CORNEAS TO STUDY PARTICIPANTS           | 13 |
| 78 | 3.1.2.1. DONOR NOT AVAILABLE                                       | 14 |
| 79 | 3.1.2.2. RESCHEDULED SURGERY AND/OR REASSIGNMENT OF TISSUE         | 14 |
| 80 | 3.1.3. EYE BANK PROCEDURES FOR STUDY IMAGES                        | 14 |
| 81 | 3.1.3.1 SCREENING IMAGES                                           | 14 |
| 82 | 3.1.3.2 PRE-OPERATIVE IMAGES                                       | 14 |

|     |                                                                       |           |
|-----|-----------------------------------------------------------------------|-----------|
| 83  | <b><u>CHAPTER 4. TRANSPLANTATION AND FOLLOW UP CLINICAL SITES</u></b> | <b>15</b> |
| 84  | 4.1. ENDOTHELIAL KERATOPLASTY PROCEDURE                               | 15        |
| 85  | 4.2. POST-OPERATIVE MANAGEMENT                                        | 15        |
| 86  | 4.3. FOLLOW-UP VISIT SCHEDULE                                         | 15        |
| 87  | 4.4. TESTING PROCEDURES                                               | 16        |
| 88  | 4.5. DEFINITION OF TESTING PROCEDURES                                 | 16        |
| 89  | 4.5.1. SLIT LAMP EXAMINATION                                          | 16        |
| 90  | 4.5.1.1 RECIPIENT CORNEAL STROMA CLARITY                              | 16        |
| 91  | 4.5.1.2 DONOR CORNEAL STROMA CLARITY                                  | 17        |
| 92  | 4.5.1.3 GRAFT REJECTION ASSESSMENT                                    | 17        |
| 93  | 4.5.2. INTRAOCULAR PRESSURE                                           | 17        |
| 94  | 4.5.3. ULTRASONIC PACHYMETRY                                          | 17        |
| 95  | 4.5.4. SPECULAR/ CONFOCAL MICROSCOPY                                  | 17        |
| 96  | 4.6. ADDITIONAL PROCEDURES                                            | 17        |
| 97  | 4.7. GRAFT FAILURE                                                    | 18        |
| 98  | 4.8. FINAL STATUS                                                     | 19        |
| 99  | <b><u>CHAPTER 5. ADVERSE EVENT REPORTING</u></b>                      | <b>20</b> |
| 100 | 5.1. ADVERSE EVENT REPORTING AND REVIEW                               | 20        |
| 101 | 5.2. DATA AND SAFETY MONITORING COMMITTEE REVIEW OF ADVERSE EVENTS    | 21        |
| 102 | 5.3. RISKS AND DISCOMFORTS                                            | 21        |
| 103 | <b><u>CHAPTER 6. MISCELLANEOUS CONSIDERATIONS</u></b>                 | <b>23</b> |
| 104 | 6.1. POTENTIAL BENEFITS TO SUBJECTS                                   | 23        |
| 105 | 6.2. ALTERNATIVE(S) TO PARTICIPATION                                  | 23        |
| 106 | 6.3. SPECIAL CONSIDERATIONS IN FOLLOW-UP                              | 23        |
| 107 | 6.4. WOMEN AND MINORITIES                                             | 23        |
| 108 | 6.5. FINANCIAL INFORMATION                                            | 24        |
| 109 | 6.6. CONFIDENTIALITY                                                  | 24        |
| 110 | 6.7. PRIVACY OF PROTECTED HEALTH INFORMATION                          | 24        |
| 111 |                                                                       |           |
| 112 | <b><u>CHAPTER 7. STATISTICAL METHODS</u></b>                          | <b>25</b> |
| 113 |                                                                       |           |
| 114 | 7.1. SAMPLE SIZE                                                      | 25        |
| 115 | 7.2. DATA ANALYSIS                                                    | 25        |
| 116 | 7.2.1. PRIMARY ANALYSIS OF GRAFT FAILURE                              | 25        |
| 117 | 7.2.1.1. UNADJUSTED ANALYSIS                                          | 26        |
| 118 | 7.2.1.2. ADJUSTED ANALYSIS                                            | 26        |
| 119 | 7.2.2. SECONDARY ANALYSES OF GRAFT FAILURE                            | 26        |
| 120 | 7.2.2.1. PRESERVATION TIME                                            | 26        |
| 121 | 7.2.2.2. PREDICTIVE FACTORS                                           | 27        |
| 122 | 7.2.2.3. ECD AS TIME DEPENDENT PREDICTOR OF GRAFT FAILURE             | 27        |
| 123 | 7.2.3. GRAFT REJECTION                                                | 28        |
| 124 | 7.2.4. ENDOTHELIAL CELL DENSITY (ECD)                                 | 28        |
| 125 | 7.2.4.1. INCLUDED SUBJECTS                                            | 28        |

|     |                                                                             |           |
|-----|-----------------------------------------------------------------------------|-----------|
| 126 | 7.2.4.2. OUTCOME MEASURES                                                   | 28        |
| 127 | 7.2.4.3. DESCRIPTIVE STATISTICS                                             | 28        |
| 128 | 7.2.4.4. PRIMARY ANALYSIS                                                   | 28        |
| 129 | 7.2.4.5. SECONDARY ANALYSIS                                                 | 29        |
| 130 | 7.2.4.5.1. SENSITIVITY ANALYSIS                                             | 29        |
| 131 | 7.2.4.5.2. ANALYSIS WITH DONOR TISSUE PRESERVATION TIME                     |           |
| 132 | AS CONTINUOUS/ MULTI-CATEGORICAL VARIABLE                                   | 29        |
| 133 | 7.2.4.5.3. LONGITUDINAL ANALYSIS                                            | 29        |
| 134 | 7.2.5. COURSE OF CORNEA CHANGES AFTER ENDOTHELIAL KERATOPLASTY              | 29        |
| 135 | 7.2.6. SAFETY ANALYSIS PLAN                                                 | 29        |
| 136 | 7.2.7. ADDITIONAL TABULATION AND ANALYSES                                   | 30        |
| 137 | 7.2.8. DSMC INTERIM ANALYSIS PLAN                                           | 30        |
| 138 |                                                                             |           |
| 139 | <b><u>REFERENCES</u></b>                                                    | <b>31</b> |
| 140 |                                                                             |           |
| 141 | <b><u>APPENDIX A:</u></b>                                                   |           |
| 142 | <b><u>PROTOCOL AMENDMENT; EXTENSION OF FOLLOW-UP TO COMMON END DATE</u></b> | <b>33</b> |
| 143 |                                                                             |           |

144  
145  
146  
147  
148  
149  
150  
151  
152  
153  
154  
155  
156  
157  
158  
159  
160  
161  
162  
163  
164  
165  
166  
167

## Chapter 1 BACKGROUND AND RATIONALE

### 1.1 Background

The Cornea Donor Study (CDS) was conceived in 1997 when a real threat to the donor pool was present based on the concerns of an emerging HIV and hepatitis epidemic, the impact of refractive surgery procedures, an aging population with a rise in the number of Fuchs' Endothelial Corneal Dystrophy (FECD) and pseudophakic bullous keratopathy (PBK) cases in the United States, and a worldwide demand for corneal tissue. This was most prescient, since the number of corneas provided by eye banks in the United States subsequently rose from 43,492 cases in 1997 to 59,271 in 2010, a 37% increase in demand.(1) This demand has been met by our phenomenal success in changing the perception among patients, surgeons, and the eye bank community that older donor tissue (> 65 years of age to 75) is as suitable and successful in keratoplasty as younger tissue, at least for the management of FECD and PBK cases. The use of older donor tissue has resulted in opening up a whole pool of tissue that would not have been used by many surgeons in the United States. This change in perception is the result of a simple, but powerful, evidence-based prospective, masked clinical trial, which showed 86% graft success following penetrating keratoplasty (PKP) for endothelial dysfunction conditions at 5 years in both the  $\geq 65$  to 75 year donor group and the <65 donor group. As an aside, the CDS also demonstrated the tremendous value of an academic and community network of well trained corneal surgeons and their ability to work with a coordinating center and corneal endothelial image analysis reading center to produce high quality and reliable data with a tremendous impact on practice patterns in corneal transplantation.

168 Several factors which had the potential to impact the donor supply in 1997 still remain, new  
169 issues have arisen, and all impact the future efficient provision donor tissue and need for  
170 increasing the donor supply:

- 171  
172 1. The donor pool is impacted by a continued threat from common viral infections, in particular  
173 Hepatitis B, with 2,698 donors alone rejected in 2008 and 3,631 donors in 2010 (a 34%  
174 increase in unusable tissue from the previous year) based on a positive Hepatitis B Core  
175 (HBcAB) antibody test.(1)
- 176 2. With increasing FDA regulations towards testing for emerging infections, such as West Nile  
177 Virus (from 6 cases in 2008 to 97 cases in 2010, a more than 15 fold increase,(1) and Chagas  
178 Disease,(2.3) more tissue will be rejected, or delays in test results will result in cancellation  
179 of transplants. In addition, as additional serologic testing is added, the test could delay tissue  
180 release or result in false positives that could even decrease tissue supply.
- 181 3. For serious potentially transmissible diseases, such as Prion agents, no reliable laboratory test  
182 currently exists and only historical screening can be used to safeguard transplant recipients.  
183 This strategy is justified only as long as the general population prevalence rate of Prion  
184 disease is small. If testing for potential slow virus diseases disqualifies a substantial number  
185 of donors, this could have a tremendous negative impact on the donor pool.
- 186 4. The impact of an expanding aging population over 65 with the addition of the baby boomers  
187 will result in a greater number of FECD and PBK cases, and increased demand for tissue.
- 188 5. The phenomenal growth of endothelial keratoplasty (EK), specifically Descemet Stripping  
189 Endothelial Keratoplasty (DSEK) or Descemet Stripping Automated Endothelial

190 Keratoplasty with the use of an automated microkeratome (DSAEK), in the past five years  
191 with a more than three-fold increase from 6,027 cases in 2006 to 19,159 in 2010(1) has  
192 opened up a new pool of patients in which endothelial dysfunction cases are being treated  
193 surgically before structural damage occurs.(4) This growth has been assisted by improved  
194 efficiency as a result of an increasing number of eye banks preparing the donor tissue for the  
195 EK procedure, rather than in the operating room by the surgeon. At the same time, the  
196 primary donor failure rate for EK has been reported as high as 5% on average(4) is 10x as  
197 high as in PKP (e.g. in the CDS, reference 5). As this procedure gains even wider acceptance,  
198 further impact on the donor pool will occur. Although donors that have anterior scars or  
199 have undergone refractive surgical procedures may now be used for EK,(6) this positive  
200 impact on the donor pool is offset by the earlier implementation of a surgical approach with  
201 EK and a higher primary donor failure rate.

- 202 6. More tissue will also be needed in the future due to a potentially higher % yield loss of tissue  
203 during the process of tissue cutting either for DSAEK or new procedures still under  
204 development, including Descemet Membrane Automated Endothelial Keratoplasty  
205 (DMAEK) and Descemet Membrane Endothelial Keratoplasty (DMEK).
- 206 7. An increasing number of donors are being rejected because of cataract surgery incisions that  
207 are too close to the central cornea. As the use of older donor tissue from previous cataract  
208 surgery patients becomes more commonplace, prior endothelial damage from these cataract  
209 incision wounds will impact the use of the larger donor EK grafts which are commonly up to  
210 9 mm in diameter (personal communication, Gerald Cole, Tissue Banks International).
- 211 8. Unlike Canada, where transplant recipients must be on a long waiting list, American  
212 surgeons and their patients have been fortunate to generally have their transplant surgical  
213 cases on a scheduled basis. With all the issues above, cancelled surgeries due to the lack of  
214 tissue could occur frequently, resulting in lost revenues and added cost to the facility, the  
215 surgeon, and in some cases the patient and families who have taken off work for the  
216 procedure.

217  
218 With all these concerns listed above, flexibility with the use of longer preserved corneas within  
219 the FDA guidelines will help increase the donor tissue used domestically and help to obviate  
220 these concerns as they may arise.

221  
222 The status of the national donor supply remains dynamic with fluctuations on a daily, weekly,  
223 and monthly basis depending on donor, surgeon, and patient supply and demand. It is these  
224 dynamic fluctuations and the various threats that loom to the donor supply listed above,  
225 including emerging infections, which have driven the eye banking community to continually find  
226 better ways to have a more orderly donor tissue supply with maximum flexibility within FDA  
227 limits for tissue usage. This continuing desire has led to the strong reaffirmation of this proposal  
228 by the eye bank and surgeon community to help assure that there will be an adequate supply of  
229 transplantable donor tissue when the study would be completed and results publicized in 2016-  
230 17.

### 231 232 **1.1.1 Studies of Preservation Time**

233 Most studies have examined either death to surgery or time from preservation in medium to  
234 surgery (preservation time) as a possible confounding variable or potential factor influencing  
235 corneal clarity without it being the primary variable of interest; thus, the clinical outcome of

236 graft success and its relation to preservation time has been unclear. In fact, there have been no  
237 prospective masked trials that have randomized donor groups on this basis.

238

239 PKP Findings:

240 • Chang et al(7) and Abbott et al(8) indicate that death-to-surgery times were not positively  
241 correlated with graft clarity following PKP.

242 • Wagoner et al(9) showed in a retrospective study of 234 PKPs utilizing donor tissue  
243 ranging in preservation time from 168 to 348 hours in Optisol GS that the likelihood of graft  
244 survival was not statistically significantly affected by progressively longer periods of donor  
245 storage time with no primary donor failures.

246 • Doganay et al(10) with a group of 48 patients undergoing PKP for keratoconus, FECD,  
247 and PBK, examined preservation time in one group up to an average of 233 hours in Optisol GS  
248 (n=18) compared to another group on average of 21 hours. No difference on graft survival was  
249 noted in this small series.

250 • Sugar et al(11) noted that an increase in stromal edema and Descemet folds increased  
251 with higher death-to-preservation time following PKP in the CDS, but death-to-surgery was not  
252 a variable of interest and the time from death to use was limited to 5 days.

253

254 EK Findings:

255 • Guttman(12) in a small, non-peer reviewed report, found greater cell loss at six months  
256 following EK in those corneas that were used over 96 hours with the correlation lost at 12  
257 months. The highest death to use time observed in the study was 182 hours (7.6 days).

258 • Price et al(13) showed with EK that ECD was not found to be significantly correlated  
259 with death to preservation or death to use time.

260 • Chen et al(14) and Terry et al(15) found no influence of the time from death to  
261 implantation on graft success following EK, but mean time was approximately 95 hours. This  
262 lack of correlation of storage time with graft success was also emphasized in an editorial by  
263 Terry.(16)

264 • Terry et al(17) in 362 eyes following EK with storage time averaging 99 hours (range 21  
265 to 186 hrs), showed no difference in cell loss at 2 years for those stored up to 4 days compared  
266 to those stored up to 8 days.

267

268 **1.2 Rationale**

269 This study addresses an important public health issue related to the utilization of donor tissue for  
270 corneal transplantation and the need to increase and secure the donor pool. Similar to the bias  
271 which existed regarding donor age prior to the initiation of the CDS, the majority of corneal  
272 surgeons in the United States do not accept tissue with preservation time longer than 7 to 8 days,  
273 even though the FDA approval of Optisol GS, since its introduction in the early 90's, is for a  
274 preservation time of up to 14 days. Instead these corneas are exported to the international  
275 community where they are routinely transplanted up to 14 days of storage. A lack of  
276 information, particularly on a preservation time over 7 days, has likely contributed to a bias  
277 against using corneal tissue beyond this time. This study will address this bias by examining two  
278 parameters of long-term success: recipient corneal (stromal) clarity and endothelial cell density  
279 following EK (4) for the endothelial dysfunction conditions that have moderate risk for failure,  
280 FECD and PBK. Demand for corneas has substantially increased with the advent of EK.(1) In  
281 addition to the increased demand, there are additional areas of concern which may impact the



282 future donor supply including potential changes in the cornea evaluation process such as  
283 increased regulations and more extensive laboratory requirements to test for emerging infections,  
284 e.g. Hepatitis B and C, West Nile Virus, Chagas Disease.(2.3) By changing the practice pattern  
285 and increasing utilization of tissue beyond 7 days up to the FDA approved, 14 days from  
286 preservation to surgery, this will facilitate increasing the domestic donor supply enabling easier  
287 distribution of tissue and more time for tissue evaluation to rule out emerging infections with  
288 suspected donors.

289

### 290 **1.3 Study Objectives**

291 The primary objectives of the “Effect of Corneal Preservation Time on Long-Term Graft  
292 Success” (CPTS) study are:

- 293 • To determine if the 3-year graft failure rate following EK performed with donor corneas with  
294 a preservation time of 8 to 14 days is non-inferior to the failure rate when donor corneas with  
295 a preservation time of 7 or fewer days are used.
- 296 • To determine if the central corneal endothelial cell density 3-years after EK is related to  
297 preservation time.
- 298 • To evaluate the effect of donor, operative and postoperative factors on graft failure and  
299 endothelial cell density three years following EK.

300

### 301 **1.4 Synopsis of Study Design**

302

#### 303 **1.4.1. Study Design**

304 The CPTS is a randomized, controlled clinical trial examining the impact of preservation time on  
305 graft failure and endothelial cell density following EK. The study has been designed so that the  
306 surgeons and eye banks can follow and provide their usual surgical and post-operative  
307 procedures and care to study participants with the exception of assignment of donor tissue.  
308 Study eyes will be randomly assigned to receive a donor cornea from preservation date to  
309 surgery date of 8 to 14 days or a donor cornea from preservation date to surgery date of 7 or  
310 fewer days, with a comparable death to preservation time for both groups. Surgeons and study  
311 participants are masked to time from preservation to surgery.

312

#### 313 **1.4.2. Major Eligibility Criteria**

##### 314 **1.4.2.1. Study Participants**

315

316 Major eligibility criteria include:

- 317 • Study participant age between 30 and <91 years with a minimum life expectancy of 3 years  
318 and at least one eligible eye
- 319 • Study eye is a candidate for EK due to one of two conditions related to endothelial  
320 dysfunction:
  - 321 ○ Fuchs’ Endothelial Corneal Dystrophy (FECD)
  - 322 ○ Aphakic/pseudophakic corneal edema
- 323 • Eyes with anterior chamber intraocular lens (IOL) are excluded

324

325 Specific eligibility criteria are listed in Section 3.1. The determination of eye eligibility is  
326 performed at the time EK surgery is planned. A participant can have two study eyes if both eyes  
327 are eligible. The eligibility of the second eye would be assessed at the time surgery on the



328 second eye is being scheduled. Surgery on the second study eye can be performed no sooner  
329 than 6 weeks after EK on the first study eye.

330  
331

#### 332 **1.4.2.2. Donor Corneas**

333 Eye banks will follow their procedural routine for procurement of tissue and determining its  
334 suitability for EK, including prior LASIK or photorefractive keratectomy donors, in accordance  
335 with the Medical Standards and Procedure Manual of the EBAA(19,20). This includes standard  
336 serologic testing, specular microscopy, and slit lamp examination.

337

338 The following major eligibility criteria will apply to all donor tissue assigned to study eyes:

- 339 • Meets current EBAA and eye bank standards for human transplantation
- 340 • Age of donor at time of death 10-75 years
- 341 • If the donor body was refrigerated or eyes on ice within 10 hours of death, the body or  
342 eye may stay refrigerated up to  $\leq 20$  hrs; if no refrigeration then the death to preservation  
343 time should be  $\leq 10$  hrs
- 344 • Eye bank determined minimum ECD of  $\geq 2300$  cells/mm<sup>2</sup> (upon the initial screening  
345 determination of ECD)
- 346 • Polymorphism/Polymegethism: None to no more than mild changes (slight)
- 347 • Guttae: no true guttae present
- 348 • No evidence of central endothelial cell damage/trauma or dystrophy, such as FECD

349

#### 350 **1.4.2.3. Treatment Groups**

351 Enrolled eyes of study participants will be randomly assigned to receive either a donor cornea  
352 with a preservation time of 8 to 14 days or a donor cornea with a preservation time of 7 or fewer  
353 days.

354

#### 355 **1.4.2.4. Sample Size**

356 1,330 study eyes from up to 1,330 study participants, depending on what proportion of  
357 participants elect and are eligible to enroll both eyes.

358

#### 359 **1.4.2.5. Visit Schedule and Procedures**

360 Enrolled eyes of study participants will be examined at a baseline/enrollment visit, at the time of  
361 EK surgery, and at post-operative visits at 1 day, 1 week, 1 month, 6, 12, 24, and 36 months in  
362 addition to any routine care visits. Participants with two study eyes will follow a modified visit  
363 schedule to minimize return visits for participants that had bilateral EK as part of the study.

364

365 Procedures at each protocol visit will follow the surgeon's standard of care in addition to detailed  
366 and standardized measurements of recipient and donor corneal stroma clarity, pachymetry, and  
367 central endothelial cell density as outlined in the Table in Section 4.3. Non-protocol visits will  
368 follow the surgeon's standard of care.

369

370 **1.4.2.6. Outcomes**

371 **Primary Outcome Measure:** Graft failure, defined as the occurrence of one of the following  
372 within 3 years of surgery:

- 373 • Regrafting of the study eye for any reason
- 374 • Cornea which remains cloudy without clearing, according to the following:
  - 375 (1) cloudy cornea on the first postoperative day which does not clear within 8 weeks
  - 376 OR
  - 377 (2) cloudy cornea which was initially clear postoperatively but becomes and remains  
378 cloudy for 3 months without clearing.

379 **Secondary Outcome Measure:** Endothelial cell density at 3 years from surgery, conditional on  
380 graft survival at 3 years from surgery.

381  
382 **1.5 General Considerations**

383 The study is being conducted in accordance with the ethical principles that have their origin in  
384 the Declaration of Helsinki, with the protocol described herein, and with the standards of Good  
385 Clinical Practice. The CPTS Procedures Manuals provide details of the procedures followed by  
386 the eye banks and by the clinical sites. Data will be directly collected in electronic case report  
387 forms, which will be considered the source data.

388  
389

390 **Chapter 2**  
391 **ELIGIBILITY AND ENROLLMENT**  
392 **CLINICAL SITES**

393  
394 **2.1 Eligibility Assessment**

395 Eligibility is assessed during a routine examination by an investigator, as there are no  
396 examination procedures required to assess patient eligibility other than those that are part of  
397 standard patient care.

398  
399 A participant can have two study eyes if both eyes are eligible at the time of enrollment or if the  
400 second eye becomes eligible at a later time. The determination of eye eligibility is performed at  
401 the time EK surgery is planned, meaning that the eligibility of the second eye will be assessed at  
402 the time surgery on the second eye is being scheduled. Surgery on the second eye can be  
403 performed no sooner than 6 weeks after EK on the first eye. Participants with two eligible eyes  
404 will have the option of deciding whether to include one or both eyes in the study.

405  
406 **2.2 Eligibility Criteria**

407 To be eligible, a study participant must meet the participant inclusion criteria and have at least  
408 one eye meeting the study eye inclusion criteria and none of the exclusion criteria.

409  
410 **2.2.1. Study Participant Eligibility Criteria**

411 **2.2.1.1 Study Participant Inclusion Criteria**

- 412 1) Age range between 30 and <91 years with minimum life expectancy of at least 3 years.  
413 2) Willingness to return for follow-up study visits at 1 day, 1 week, 1 month, 6 months, 1 year,  
414 2 years and 3 years.  
415 3) Fluent in English or Spanish.

416  
417 **2.2.1.2 Study Participant Exclusion Criteria**

- 418 1) Decisionally and/or cognitively impaired  
419

420 **2.2.2 Study Eye Inclusion Criteria**

- 421 1) EK is scheduled between 10 and 60 days after enrollment  
422 • *The 10-day requirement relates to the need to be able to randomly assign the eye to*  
423 *either intervention group.*  
424 • *The 60-day requirement relates to the need to have current eligibility and enrollment*  
425 *data at the time of surgery. If surgery is postponed to >60 days after the initial*  
426 *enrollment visit, a new Baseline Visit and eligibility assessment will have to be*  
427 *performed.*  
428 2) Presence of a condition related to endothelial dysfunction which will be treated by EK.  
429 • Eligible indications for EK include:  
430 a. Presence of FECD meeting at least one of the following:  
431 ➤ Phakic FECD  
432 ➤ Phakic FECD with cataract  
433 ○ Triple procedure including EK for FECD, cataract extraction and  
434 posterior chamber intraocular lens implantation (IOL) is allowed

- 435                   ➤ Aphakic FECD  
436                   ➤ Pseudophakic FECD with posterior capsule supported, suture-fixated, or  
437                   sulcus-supported posterior chamber IOL  
438           b. Aphakic or pseudophakic corneal edema with posterior capsule supported, suture-  
439           fixated, or sulcus-supported posterior chamber IOL without FECD  
440

### 441 **2.2.3 Study Eye Exclusion Criteria**

- 442 1) Prior EK  
443 2) Indication for surgery that is not suitable for EK (e.g, keratoconus, stromal dystrophies and  
444     scars)  
445 3) Presence of a condition that has a very high probability for failure (e.g., failed EK or PKP,  
446     heavily vascularized cornea, uncontrolled uveitis)  
447 4) Other primary endothelial dysfunction conditions including posterior polymorphous corneal  
448     dystrophy and congenital hereditary corneal dystrophy  
449 5) Anterior chamber IOL in study eye prior to or anticipated during EK  
450 6) Planned intraocular lens exchange of an anterior chamber IOL with a posterior chamber IOL  
451     in study eye at time of study EK  
452 7) Pre-operative central sub-epithelial or stromal scarring that the investigator believes is  
453     visually significant and could impact post-operative stromal clarity assessment  
454 8) Stromal vascularization that is visually significant (by investigator's judgment)  
455 9) Presence of anterior synechiae (iris to cornea)  
456 10) Peripheral anterior synechiae (iris to angle) in the angle greater than a total of three clock  
457     hours  
458 11) Hypotony (Intraocular pressure <10 mm Hg)  
459 12) Uncontrolled (defined as intraocular pressure > 25mm Hg) glaucoma with or without prior  
460     filtering surgery or shunt or mini-shunt placement.  
461 *A shunt or mini-shunt is any device implanted to lower intraocular pressure through an external route*  
462 *(e.g Ahmed) or internal route (e.g. Glaukos) that is present in the anterior chamber angle or extends into*  
463 *the anterior chamber.*  
464 13) Controlled glaucoma with prior shunt or mini-shunt placement for glaucoma  
465     ○ Note: FECD or pseudophakic/aphakic corneal edema with posterior chamber IOL that  
466     also have undergone filtering surgery (without shunt or mini-shunt) in which  
467     glaucoma is currently considered under control will be eligible  
468 14) Fellow eye visual acuity < 20/200 that is not correctable with EK  
469

### 470 **2.3 Eligibility Criteria for Second Study Eye**

- 471 1) Study participant has already enrolled one eye  
472 2) The second eye meets all study eye inclusion and exclusion criteria (2.2.2 and 2.2.3)  
473 3) EK surgery in second eye is not planned within 6 weeks of EK on first study eye  
474

### 475 **2.4 Screening Evaluation and Baseline Testing**

#### 476 **2.4.1 Historical Information**

477 A history will be elicited from the potential study participant and extracted from available  
478 medical records. It is anticipated that potential participants will be patients within the practices

479 of the site investigator who are deciding to undergo EK with the respective surgeon. Thus,  
480 obtaining histories relevant to the CPTS eligibility criteria will be part of routine care.

#### 481 **2.4.2 Baseline Testing**

482 Potential eligibility will be assessed as part of a routine-care examination as stated above.  
483 However, prior to completing any procedures or collecting any data that are not part of usual  
484 care, written informed consent will be obtained.

485 In addition to the usual assessment for candidates for EK for the two acceptable conditions for  
486 the CPTS, the surgeons will grade disease severity in those study participants who have FECD  
487 employing the FECD Genetics Multi-center Study Grading Assessment Guide (18). Family  
488 history of FECD will be solicited.

#### 489 **2.5 Subject Enrollment**

490 A maximum of 1330 participants will be enrolled, depending on the number of participants who  
491 enroll both eyes into the study to reach the recruitment goal of 1330 study eyes with a goal to  
492 enroll an appropriate representation of minorities. As the enrollment goal approaches, sites will  
493 be notified of the end date for recruitment. Study participants who have signed an informed  
494 consent form can be randomized up until the end date.

495  
496 After the informed consent form is signed, enrollment will be accomplished using the study  
497 website. Enrollment must be completed at least 10 days prior to the date of surgery. The study  
498 participant is then managed according to the investigator's usual routine without regard to the  
499 fact that the study participant is participating in the trial.

#### 500 **2.6 Randomization**

501  
502 Randomization of participant eyes will occur via an automated computer program. The  
503 randomization schedule will be stratified by surgeon using a permuted blocks design. The  
504 randomization groups are as follows:

- 505 • Preservation Time Group:  $\leq 7$  days
- 506 • Preservation Time Group: 8-14 days

507  
508  
509 A study participant may have both eyes enrolled in the study. The eye scheduled for surgery  
510 which will occur first will be assigned randomly to a preservation time group, and the eye  
511 scheduled for surgery which will occur second will be assigned to the alternate group.

512  
513

514 **Chapter 3**  
515 **DONOR ELIGIBILITY AND CORNEA ASSIGNMENT**  
516 **EYE BANKS**

517  
518 **3.1 Eye Bank Procedures**

519 With the exception of procedures related to assignment of a cornea to a participant eye, specular  
520 microscopy external calibration and technician certification procedures and study procedures for  
521 obtaining specular images, eye bank procedures will mimic standard procedures as closely as  
522 possible to minimize disruption to their normal routine. Eye banks will be able to use any FDA-  
523 approved media for intermediate term storage up to 14 days at 4°C.

524  
525 **3.1.1 Donor Eligibility**

526 All eye banks will follow their procedural routine for procurement of tissue and determination of  
527 suitability for EK, including prior LASIK or PRK donors, in accordance with the Medical  
528 Standards and Procedure Manual of the EBAA(19,20). This includes standard serologic testing,  
529 specular microscopy, and slit lamp examination.

530  
531 The following eligibility criteria will apply to all donor tissue assigned to participant eyes:

- 532 • Obtained from an EBAA accredited eye bank  
533 • Meets current EBAA and eye bank standards for human transplantation  
534 • Age of donor at time of death 10-75 years  
535 • If the donor body was refrigerated or eyes on ice within 10 hours of death, the body or eye  
536 may stay refrigerated up to  $\leq 20$  hrs; if no refrigeration then the death to preservation time  
537 should be  $\leq 10$  hrs  
538 • Eye bank determined minimum ECD of  $\geq 2300$  cells/mm<sup>2</sup> (upon the initial screening  
539 determination of ECD)  
540 • Polymorphism/Polymegethism: None to no more than mild changes (slight)  
541 • Guttae: no true guttae present  
542 • No evidence of central endothelial cell damage/trauma or dystrophy, such as FECD.

543  
544 **3.1.2 Assignment of Donor to Study Eyes**

545 The primary eye bank, as designated by the clinical site, will receive a notification when there is  
546 a pending donor assignment. The Eye Bank Procedures Manual provides details regarding the  
547 assignment process. When the eye bank submits an assignment request, a computer program  
548 will use a minimization algorithm to evaluate all available donors and ensure a balance of  
549 subgroups (0-4 days, 5-7 days, 8-11 days, 12-14 days from preservation to surgery) within the  
550 primary randomization groups. Time from preservation to scheduled surgery date will be  
551 calculated as whole days for the purpose of assignment into the appropriate randomized  
552 preservation time group. As surgeons will be masked to all donor information, the label and  
553 report that accompanies the donor will be generated from the study website in such a way to  
554 maintain masking.



556 After the donor assignment procedure is completed, the eye bank will complete a donor  
557 information form on the study website, which includes information about the retrieval of the  
558 cornea (date/time of death, date/time of retrieval, aspects of the processing), cause of death, age  
559 of the donor, and ECD.

560  
561 For those assignments where pre-cut tissue has been requested, the eye bank will cut and prepare  
562 the tissue on the same day that they would cut tissue if the donor was being assigned to a non-  
563 study participant for that particular surgeon, and will complete a cutting information form.

564  
565 **3.1.2.1 Donor Not Available**  
566 If an eligible donor in the correct preservation time window is not available at the primary eye  
567 bank on the date of assignment, attempts will be made by the primary eye bank to import tissue  
568 from another EBAA accredited eye bank. If tissue in the correct preservation time window is  
569 still not available, it will be up to the surgeon to either (1) reschedule the surgery or (2) inform  
570 the participant that they will receive a donor that is otherwise healthy but does not meet criteria  
571 to be in the study and that they will be discontinued from the study.

572  
573 **3.1.2.2 Rescheduled Surgery and/or Reassignment of Tissue**

574 If the surgeon rejects the assigned donor cornea for any reason, surgery will be rescheduled, and  
575 a new assignment will be completed.

576 If surgery is rescheduled for any reason, and an already assigned donor cornea is no longer in the  
577 correct preservation time window, a new assignment will be completed.

578  
579 **3.1.3 Eye Bank Procedures for Study Images**  
580 Detailed procedures for obtaining best image quality and transmission to the DMAC will be  
581 provided in the CPTS-CIARC Calibration, Certification, and Study Imaging Clinical Procedure  
582 Manual and the technician(s) performing this procedure will be certified by the Cornea Image  
583 Analysis Reading Center (CIARC).

584  
585 **3.1.3.1 Screening Images**  
586 Up to 3 screening images of the central donor corneal endothelium obtained according to the eye  
587 bank's usual procedure should be submitted to the DMAC.

588  
589 **3.1.3.2 Pre-Operative Images**  
590 Three pre-operative images of the central donor corneal endothelium should be obtained in a  
591 viewing chamber by a certified technician, and submitted to the DMAC. If the eye bank is  
592 performing the cutting, the eye bank should obtain these pre-operative images after the tissue has  
593 been cut. If the surgeon is performing the cutting, the eye bank should obtain these pre-operative  
594 images as close as possible prior to shipment to the surgeon following appropriate warming to  
595 room temperature.

596

597 **Chapter 4**  
598 **TRANSPLANTATION AND FOLLOW UP**  
599 **CLINICAL SITES**  
600

601 **4.1 Endothelial keratoplasty procedure**

602 Surgery (DSEK, DSAEK) will be performed according to the investigator's usual routine.  
603 Aspects of the surgical technique and procedure will be tracked, but not standardized. Data to be  
604 collected will include incision size, insertion method, air usage, other procedures (e.g. cataract  
605 surgery), and operative complications (e.g., difficult donor preparation, difficult placement). *As a*  
606 *reminder, the DMAEK and DMEK procedures will not be acceptable endothelial keratoplasty*  
607 *procedures for the CPTS nor will be PKP.*

608  
609 The surgeon will be masked to donor parameters (e.g. donor age, donor ECD), except the FDA-  
610 approved 4<sup>0</sup>C preservation medium being employed (Optisol GS, Life 4<sup>0</sup>C, etc.) and parameters  
611 needed to perform the surgery (e.g. post-cut thickness). Most importantly the surgeon and study  
612 participant will be masked to preservation time.

613  
614 **4.2 Post-operative Management**

615 Postoperative management will be at the discretion of the surgeon based on his/her usual  
616 practices. Key aspects of pharmacologic management (e.g. topical corticosteroid usage) will be  
617 collected on the data forms.

618 **4.3 Follow-up visit schedule**

619 Protocol-specified follow-up visits (and visit windows) for the first eye, established to conform  
620 to the usual practice and timed from surgery date, will be as follows:

- 621 • Day 1 (1-2 days)
- 622 • Day 7 (5 – 9 days)
- 623 • Day 30 (20-40 days)
- 624 • 6 months (4-8 months)
- 625 • 12 months (10-14 months)
- 626 • 24 months (20 - 28 months)
- 627 • 36 months (35 – 42 months)

628 Additional visits can be performed more often at the discretion of the investigator. A data form  
629 will be completed for each protocol and non-protocol visit. For example, if graft failure is  
630 determined and a regraft is required on a non-protocol visit, the appropriate follow-up visit form  
631 and graft failure form should be completed if and when this occurs.

632 If the second eye of an active participant is enrolled, a modified visit schedule will be allowed  
 633 to minimize return visits for participants that had bilateral EK as part of the study. For example,  
 634 sites will be allowed to follow standard of care practices to avoid unnecessary visits linked to  
 635 targeting each eye within its respective windows as listed above. Sites are encouraged to  
 636 schedule both eyes within their respective windows when the windows overlap, but at minimum  
 637 at least one eye must be within its target visit window at each visit. The only exception to this is  
 638 the 36 month visit which must be completed for each eye within its respective window, even if  
 639 an extra return visit is required.

#### 640 4.4 Testing procedures

641 The Table below shows the key elements of data collection at each study visit. Additional visits  
 642 may occur as needed for the usual care of the participant.

643

|                                                 | Pre-op | 1 Day | 1 Week | 1 Month | 6 Months | 12 Months | 24 Months | 36 Months |
|-------------------------------------------------|--------|-------|--------|---------|----------|-----------|-----------|-----------|
| <b>Parameters</b>                               |        |       |        |         |          |           |           |           |
| Medication History                              | X      | X     | X      | X       | X        | X         | X         | X         |
| Slit lamp examination                           | X      | X     | X      | X       | X        | X         | X         | X         |
| Intraocular pressure                            | X      |       | X      | X       | X        | X         | X         | X         |
| Ultrasonic pachymetry                           |        |       | X      | X       | X        | X         | X         | X         |
| Endothelial imaging                             |        |       |        |         | X        | X         | X         | X         |
| Post-op complications and other untoward events |        | X     | X      | X       | X        | X         | X         | X         |

644

#### 645 4.5 Definition of testing procedures

##### 646 4.5.1 Slit Lamp Examination

647 The slit lamp examination should be performed per the investigator's usual routine. Specific  
 648 details of the data collected during the slit lamp examination are found in the site procedures  
 649 manual.

650

##### 651 4.5.1.1 Recipient corneal stroma clarity

652 The recipient corneal stroma clarity will be assessed by slit lamp examination using the  
 653 following 3-level classification:

654

- 655 • clear central recipient stroma;
- 656 • equivocally cloudy central recipient stroma
- 657 • clouded central recipient stroma.

658

659 Specific details regarding the grading of recipient corneal stroma clarity are found in the Site  
660 Procedures Manual. Investigators will be provided a high resolution color standard scale and will  
661 be trained and certified on this classification scheme prior to enrolling participants.

662

#### 663 **4.5.1.2 Donor corneal stroma clarity**

664 Donor corneal stroma clarity will be assessed by slit lamp examination. Specific details  
665 regarding the grading of donor corneal stroma clarity are found in the Site Procedures Manual.

666

#### 667 **4.5.1.3 Graft rejection assessment**

668 Graft rejection will be assessed during the slit lamp examination using a modification of the  
669 Collaborative Corneal Transplantation Studies (CCTS) classification (21,22). Graft rejection will  
670 be classified as definite, probable/ possible, or not present. Details of the assessment of graft  
671 rejection are found in the Site Procedures Manual.

672 The management of suspected graft rejection episodes will be according to the investigator  
673 prerogative, but documented in the medication history.

674

#### 675 **4.5.2 Intraocular pressure**

676 Intraocular pressure will be measured using the investigator's usual routine.

#### 677 **4.5.3 Ultrasonic pachymetry**

678 Corneal thickness will be measured by a CPTS-provided ultrasonic pachymeter to ensure  
679 standardization of this measurement across sites. Technical staff acquiring this measurement will  
680 be trained and certified on study pachymeter use. If no measurement can be obtained (e.g. if the  
681 cornea is too thick), this will be noted on the data form. Measurements taken on other  
682 pachymeters will only be allowed if the study pachymeter is temporarily not functional.

#### 683 **4.5.4 Specular/confocal microscopy**

684 Specular or confocal microscopy of the central endothelium will be obtained on all participants  
685 that have not experienced graft failure to determine ECD by CIARC. Detailed procedures for  
686 obtaining best image quality and transmission to the DMAC will be provided in the CPTS-  
687 CIARC Calibration, Certification, and Study Imaging Clinical Procedure Manual and the  
688 technician(s) performing this procedure will be certified by the CIARC.

#### 689 **4.6 Additional procedures**

690 Data on all additional procedures performed on the study eye will be collected, including:

- 691 • air bubbling/repositioning in the first month
- 692 • cataract surgery and placement of intraocular lens (anterior chamber, posterior chamber)
- 693 • YAG capsulotomy

- 694       • refractive procedure (e.g. limbal relaxing incision, LASIK)  
695       • glaucoma surgery (e.g. trabeculectomy, laser trabeculoplasty, tube shunt, mini-shunt, other)  
696   Additionally, data on donor tissue rim cultures may be collected if performed as part of standard  
697   of care.

698

#### 699   **4.7 Graft Failure**

700   Graft failure will be assessed and defined as the occurrence of one of the following:

- 701       • Cornea which requires regrafting for any reason  
702       • Cornea which remains cloudy without clearing, according to the following:  
703           (1) cloudy cornea on the first postoperative day which does not clear within 8 weeks  
704           OR  
705           (2) cloudy cornea which was initially clear postoperatively but becomes and remains  
706           cloudy for 3 months without clearing.  
707               ▪ *A study participant whose cornea becomes cloudy (clouded recipient*  
708               *central stroma, based on the modified CDS grading scale) will be treated*  
709               *by the investigator's usual routine.*

710   For eyes meeting the definition of graft failure above, the principal cause of graft failure will be  
711   classified as one of the following:

- 712       • Early failure (cloudy cornea on the first postoperative day which does not clear or  
713       requires a regraft within 8 weeks), associated with surgical complications  
714       • Primary donor failure (cloudy cornea on the first postoperative day which does not  
715       clear or requires a regraft within 8 weeks), in the absence of surgical complications  
716       • Graft rejection (defined as a clouded recipient central stroma following an allograft  
717       reaction);  
718       • Non-rejection graft failure (defined as a graft that initially had a clear central recipient  
719       stroma and becomes cloudy due to causes other than an immune event. These include:  
720       surface failure, infection, glaucoma/hypotony, endothelial decompensation, interface  
721       irregularity or opacity, pre-existing stromal scarring, blunt or penetrating trauma, and  
722       other causes);

- 723           • Refractive/visual graft failure (defined as a graft that requires re-grafting due to  
724           inadequate vision while the recipient central stroma remains clear).

725

726

727 **4.8 Final Status**

728 A Participant Final Status Form will be completed if the participant dies, withdraws, or is  
729 deemed to be lost to follow-up by the CC staff. An Eye Final Status Form will be completed if a  
730 study eye is re-grafted, receives an AC IOL during surgery, experiences a suprachoroidal  
731 hemorrhage during surgery, receives a non-study donor cornea, will no longer have surgery, or  
732 experiences enucleation, phthisis, graft failure due to blunt trauma, or graft failure due to  
733 penetrating trauma,.

734



735  
736  
737  
738  
739  
740  
741  
742  
743  
744  
745

## CHAPTER 5 ADVERSE EVENT REPORTING

### 5.1 Adverse Event Reporting and Review

740 Adverse event information will be captured on the electronic case report forms or separate  
741 adverse event forms completed after surgery and at all post-op visits. Adverse events can be  
742 systemic or ocular. Death will be reported whether study related or not, with cause of death if  
743 known; systemic events will be reported only if related or possibly related to study procedures.  
744 Related and unrelated ocular adverse events will be reported only in the study eye as there is no  
745 plausible reason to believe that the EK procedure could affect a non-study eye.

746 Each site will be responsible for informing the CC of any reportable adverse events as outlined in  
747 the Site Procedures Manual. The study chair will be responsible for abiding by reporting  
748 requirements within the necessary time frames to the UHCMC IRB, NEI program officer, and  
749 FDA, as required. Each Principal Investigator is responsible for abiding by reporting  
750 requirements specific to his/her IRB.

751 Certain adverse events may require expedited reporting. Since this study does not involve  
752 investigational drugs or devices and participants in this study would have undergone EK  
753 regardless of study participation, expedited reporting of serious adverse events will be limited to  
754 unanticipated and/or serious events in the study eye that are related or possibly related to  
755 preservation time. A list of events that require expedited reporting was determined in  
756 conjunction with the DSMC. The following events require separate adverse form completion  
757 and expedited reporting by the site to the CC within 1 working day of learning of the event, and  
758 then subsequently by the CC to the Medical Monitor on the same working day of notification and  
759 to the NEI Program Office and designated DSMC member(s) within 1 week of notification:

- 760 • Endophthalmitis
- 761 • Microbial keratitis (bacterial, fungal, parasitic) within 3 months of EK
- 762 • Other unexpected, serious adverse events related or possibly related to
- 763 preservation time

764  
765 Operative and post-operative complications and all other adverse ocular findings will be  
766 recorded on the case report forms and tabulated in semi-annual DSMC reports. Adverse events  
767 presumed related to preservation time, study follow-up procedures of specular microscopy and  
768 pachymetry, or systemic events related to EK will be captured on separate adverse event forms.  
769 The DSMC will be provided the expedited adverse event reports and the tabulated semi-annual  
770 reports in a manner that will enable them to unmask the treatment group if desired.

773 **5.2 Data and Safety Monitoring Committee Review of Adverse Events**

774 The DSMC has approved the protocol and template informed consent form; they will also  
775 approve substantive amendments and will provide independent monitoring of adverse events.  
776 Cumulative adverse event data are semi-annually tabulated for review by the DSMC. Following  
777 each DSMC data review, a summary will be provided to IRBs. A list of specific adverse events  
778 to be reported to the DSMC expeditiously is given in section 5.1

779

780 **5.3 Risks and Discomforts**

781 The risks and discomforts for patients undergoing EK are the same regardless of study  
782 participation. Potential risks include:

- 783 • mild pain for approximately one week after surgery.
- 784 • temporary discomfort from the eye examination or eye drops, which may include stinging,  
785 itching, or redness.
- 786 • serious infection or bleeding in 1 in 1,000 patients and serious problems related to anesthesia  
787 in 1 in 10,000.
- 788 • in rare instances the topical drops can cause an allergic reaction, seizures, and an irregular  
789 heartbeat.
- 790 • other potential risks include developing glaucoma, additional surgery due to healing  
791 problems or movement out of position of the donor cornea, retinal swelling or detachment, or  
792 loss of vision.
- 793 • rejection reactions occur approximately 10% of the time (23), but are usually reversible if  
794 treated promptly with topical corticosteroids, but sometimes it leads to failure of the  
795 transplant.
- 796 • measurement of intraocular pressure involves a topical anesthetic and fluorescein dye carries  
797 a small risk of corneal abrasion and temporary corneal discomfort. There is the rare  
798 possibility of allergic reaction to the dye or anesthetic drops.
- 799 • Other risks of EK include:
  - 800 ○ Endophthalmitis: a serious infection inside the eye that needs prompt treatment and may  
801 cause permanent loss of vision or in severe circumstances loss of the eye
  - 802 ○ Corneal infection: a serious microbial infection of the cornea that requires immediate  
803 treatment and may result in permanent scarring and possible permanent loss of vision  
804 requiring a repeat of the corneal transplant
  - 805 ○ Rare chance of dissemination of a communicable disease from the donor tissue
  - 806 ○ Corneal scarring: permanent haze or cloudiness in the cornea that may result in  
807 permanent loss of vision requiring a repeat of the corneal transplant
  - 808 ○ Corneal neovascularization: blood vessel growth into the cornea that could subject the  
809 transplant to a higher risk for rejection and/or permanent loss of vision, requiring a repeat  
810 of the corneal transplant
  - 811 ○ Corneal swelling: thickening of the cornea that may result in loss of vision which may or  
812 may not be reversible. If not reversible, another corneal transplant may be required to  
813 restore the vision.
  - 814 ○ Wrinkling of the corneal layers: Wrinkling of the donor cornea as it heals may result in  
815 blurred vision and require another corneal transplant.

816

817 The following are risks of procedures that are not necessarily part of routine care but are  
818 being performed for the purposes of this study:

819  
820  
821  
822  
823  
824  
825  
826

- The anesthetics or instruments that touch the eye to check corneal thickness (pachymeter) or image the endothelium (confocal or specular microscope) could cause minor irritation and rarely breakdown of the surface corneal cells. There is the rare possibility of allergic reaction to the anesthetic drops or feeling faint from the procedure.

827 **CHAPTER 6**  
828 **MISCELLANEOUS CONSIDERATIONS**  
829

830 **6.1 Potential Benefits to Subjects**

831 Study participants will not benefit directly from participation in this study. If longer preservation  
832 time up to the FDA limit of 14 days can be shown to not adversely impact graft success and  
833 endothelial cell density at 3 years, more donor tissue will be available for efficient distribution  
834 within the United States for all keratoplasty procedures. In the future, if a study participant  
835 requires another EK in either the same eye or their other eye, the information obtained from this  
836 study might benefit them.

837  
838 **6.2 Alternative(s) to Participation**

839 Because of the nature of the study, the only other alternative is to not participate in the study.  
840 The potential participants' standing with his or her physician and/or hospital will not change.

841  
842 **6.3 Special Considerations in Follow-up**

843 In a long-term trial such as this in which outcome is not assessed for several years after  
844 enrollment, special measures are necessary to assure that the participants will remain in follow  
845 up and return for the outcome assessment examination. Detailed contact information will be  
846 collected at the time of enrollment and updated regularly.

847 The Coordinating Center will maintain contact with each patient. Permission for such contacts  
848 will be included in the Informed Consent Form. The principal purpose of the contacts will be to  
849 develop and maintain rapport with the participant and to update contact information. The initial  
850 phone contact will occur about one month following the EK surgery. Subsequent phone contacts  
851 will occur on a semi-annual basis. Based on the experience with these calls by the Jaeb Center  
852 in the CDS, the CC will similarly maintain this type of contact with participants throughout their  
853 3 year time in the study which the CC and DMAC believe is critically important for the validity  
854 of the study. The purpose of these calls is not to collect study data to be used for monitoring or  
855 in analyses or to provide medical information. Nor is it intended to schedule the participants for  
856 their study visits; that is up to the local study coordinator. This plan has been reviewed by the  
857 IRB at UH Case Medical Center and felt to be feasible as long as incorporated into the consent  
858 form at all our IRBs monitoring the study.

859 For participants who move out of the area of their study physician or whose medical insurance  
860 coverage changes, an attempt will be made to have their care transferred to another study  
861 physician. When this is not possible, the CC will locate an ophthalmologist in the participant's  
862 new area to arrange for follow-up and the participant will be asked to sign a medical record  
863 release form to provide the ophthalmologist with information as well as to obtain the results of  
864 examinations performed by the ophthalmologist.

865 **6.4 Women and Minorities**

866 We anticipate that study enrollment will be representative of the U.S. population of subjects who  
867 undergo corneal transplantation for these endothelial conditions. Both males and females are

868 enrolled into each protocol. All ethnic and racial groups are eligible for participation in this  
869 study, with the goal of having appropriate minority representation of those that undergo corneal  
870 transplantation in the United States.

871

## 872 **6.5 Financial Information**

873 All visits, including but not limited to, pre-operative, post-operative, surgery, and any standard of  
874 care follow-up appointments will be charged to the participant or his/her insurance carrier. The  
875 participant will be responsible for any deductible or co-payments as defined by their particular  
876 insurance carrier.

877

878 The costs for pachymetry, and specular or confocal microscopy are considered research and the  
879 costs will not be incurred by the participant.

880

881 Study participants will be given a reimbursement of \$25 for each study visit for travel costs. This  
882 payment will be processed by the Jaeb Center.

883

## 884 **6.6 Confidentiality**

885 The investigators will maintain the highest degree of confidentiality permitted for the clinical  
886 and research information obtained from participants in this clinical study. Medical and research  
887 records will be maintained in the strictest confidence. However, as part of the quality assurance  
888 and legal responsibilities of an investigator, the site must permit authorized representatives of the  
889 CC to examine (and when permitted or required by applicable law, to copy) clinical records for  
890 the purposes of quality assurance reviews, audits, and evaluation of the study safety and  
891 progress. Unless required by law, no copying of records with personally identifying information  
892 will be permitted. Only the coded identity associated with documents or other participant data  
893 may be copied (obscuring any personally identifying information) or transmitted to the CC.  
894 Authorized representatives as noted are bound to maintain strict confidentiality of medical and  
895 research information that may be linked to identified individuals.

896

## 897 **6.7 Privacy of Protected Health Information**

898 The Health Insurance Portability & Accountability Act (HIPAA) is a Federal law that helps to  
899 protect the privacy of the study participant's health information and to whom this information  
900 may be shared. The Authorization forms used for this research study will tell the study  
901 participant what health information (called Protected Health Information or PHI) will be  
902 collected for this research study, who will see the study participant's PHI and in what ways they  
903 can use the information. The researchers and staff must agree to protect the study participant's  
904 health information by using and disclosing it only as permitted by the subject in their  
905 Authorization and as directed by state and Federal law.

906

**Chapter 7**  
**STATISTICAL METHODS**

The approach to sample size and statistical analyses are summarized below. A detailed statistical analysis plan will be written and finalized prior to the completion of the study. The analysis plan synopsis in this chapter contains the framework of the anticipated final analysis plan.

**7.1 Sample Size**

The sample size of 1330 is calculated based on a non-inferiority (a single one-sided test) design with the goal to determine that the graft failure rate of the recipients of donor tissue transplanted 8 to 14 days after preservation is not worse than the graft failure rate of recipients of donor tissue transplanted  $\leq 7$  days after preservation.

| <b>Non-Inferiority<br/>Limit</b> | <b>Power = 90%</b>  |            |                       |             |           |
|----------------------------------|---------------------|------------|-----------------------|-------------|-----------|
|                                  | <b>Failure Rate</b> |            |                       |             |           |
|                                  | <b>12%</b>          | <b>10%</b> | <b>8%<sup>a</sup></b> | <b>6%</b>   | <b>4%</b> |
| <b>10%</b>                       | 362                 | 310        |                       |             |           |
| <b>8%</b>                        | 566                 | 482        | 394                   |             |           |
| <b>6%</b>                        | 1006                | 858        | 702                   | 538         |           |
| <b>4 %</b>                       | 2262                | 1928       | 1576                  | <b>1208</b> | 824       |
| <b>2%</b>                        | 9044                | 7708       | 6304                  | 4832        | 3290      |

Note: Numbers in table are total sample size for both treatment groups combined (crossover and lost to follow up are not accounted for). Half would be randomized to each group.

<sup>a</sup> CDS data: 3-year failure rate

In the Cornea Donor Study (CDS), the 3-year failure rate was 8%. Clinical expectations suggest that the graft failure rate from the EK procedure will be smaller than the failure rate from the PKP procedure that was used in CDS; therefore, a 3-year failure rate of 6% has been assumed. Based on equal allocation of recipients to each group and type I error of 5%, a sample size of 1208 will provide 90% power for a non-inferiority limit of 4%. Based on information from the CDS, approximately 10% of subjects will have incomplete follow up (due to death, withdrawal or lost to follow up) by the end of year 3. Increasing the calculated sample size by this amount gives a total of 1330 subjects (665 per group).

- The inclusion of participants with two study eyes, one in each treatment group, will tend to reduce the variance and as a result increase statistical power. To be conservative, this has not been accounted for in the sample size estimation, since the correlation of outcome with two eyes is not known.

**7.2 Data Analysis**

**7.2.1 Primary Analysis of Graft Failure**

Participant study eyes that did not have surgery, received a non-study donor, had an AC IOL implanted during surgery, or experienced a suprachoroidal hemorrhage will be excluded from the primary analysis. It is highly unlikely these events could be related to preservation time, thus inclusion of them could actually bias *towards* concluding non-inferiority. Therefore, the primary



944 analysis will deviate from the principle of intent-to-treat, but this approach is conservative for a  
945 non-inferiority analysis.

946  
947 In addition, the following will be censored at the last visit prior to occurrence: lost to follow-up,  
948 withdrawn from study, death, enucleation, phthisis, or graft failures due to a blunt or penetrating  
949 trauma.

950

#### 951 **7.2.1.1 Unadjusted Analysis**

952

- 953 • Three year Kaplan-Meier graft failure estimates with 95% confidence intervals (variance  
954 estimated using the Greenwood method) will be calculated separately for the two  
955 treatment groups ( $\leq 7$  days and 8 to 14 days from preservation to surgery). A one-sided  
956 95% confidence interval will be constructed for the difference in 3 year graft failure rates  
957 between the two groups. The bootstrap re-sampling technique will be used to account for  
958 potentially correlated data from donors who donated both corneas in this study and  
959 potentially correlated data from 2 study eyes of the same study participant. The two  
960 treatment groups will be declared equivalent if the one-sided 95% confidence interval for  
961 the difference in proportions excludes the pre-defined non-inferiority limit of 4%.

962

#### 963 **7.2.1.2 Adjusted Analysis**

- 964 • Multivariate analysis will be performed using Cox proportional hazards regression model.  
965 The primary multivariate model will include the corneal diagnosis regardless of statistical  
966 significance, in addition to time from preservation to surgery. In additional models,  
967 potential confounders including recipient and donor age, recipient and donor race, presence  
968 of glaucoma, presence of corneal vessels, history of smoking, and certain aspects of the  
969 retrieval and processing of the donor tissue (including multiple types of storage media, if  
970 more than one is used in preservation of the corneal tissues) will be screened by assessing  
971 the change in the preservation time effect when the potential confounder is controlled for in  
972 the Cox model. Variables that do not contribute significantly ( $P > 0.05$ ) will be removed  
973 from the model.
- 974 • Random surgeon effects will be tested using a generalized linear model via the SAS  
975 GLIMMIX procedure. This marginal model produces a robust standard error (RSE) by use  
976 of a sandwich estimator, which corrects for correlated data.
- 977 • Potential effect modifiers of donor tissue preservation time such as recipient age or corneal  
978 diagnosis will be screened by including first-order interaction terms. Variables that exhibit  
979 modification of the donor tissue preservation time effect with an associated P value  $< 0.05$   
980 will be retained in the model.

981

982

### 983 **7.2.2 Secondary Analyses of Graft Failure**

#### 984 **7.2.2.1 Preservation Time**

985 The time from preservation to surgery is treated as a binary variable in the primary analysis (see  
986 above section). Secondary analyses will look at the time from preservation to surgery as a  
987 categorical variable with multiple levels and as a continuous variable:

- 988 • Kaplan-Meier estimates of graft failure with 95% confidence interval will be calculated for  
989 each of the following donor groups: 0 – 4, 5 – 7, 8 – 11, and 12 – 14 days from preservation  
990 to surgery(counting partial days as whole days).  
991
- 992 • A Cox proportional hazards model will be constructed treating the time from preservation to  
993 surgery as a continuous variable (using time of day to calculate hours from preservation to  
994 surgery). Polynomial terms will be added to assess any curvilinear, J, or U shaped  
995 relationship between time from preservation to surgery and graft failure. If no significant  
996 departure from a linear relation is detected, a one sided 95% confidence interval will be  
997 computed for the hazard ratio per day of time from preservation to surgery.  
998
- 999 • The proportional hazards assumptions will be tested through the use of time-dependent  
1000 variables with a logarithm transformation of time. If this assumption is violated then hazard  
1001 ratios will be presented separately for different periods following transplant.  
1002

### 1003 7.2.2.2 Predictive Factors

1004 A Cox model will be constructed including preservation time group regardless of statistical  
1005 significance. Additional recipient/donor factors (see some examples listed below) will be  
1006 considered for the model and included, if significantly associated with graft failure ( $p < 0.05$ ).  
1007 The proportional hazards assumptions will be tested as described above.  
1008

- 1009 • Recipient factors
  - 1010 ➤ preoperative diagnosis
  - 1011 ➤ gender
  - 1012 ➤ age
  - 1013 ➤ race
  - 1014 ➤ prior use of glaucoma medication
  - 1015 ➤ prior glaucoma surgery (trabeculectomy, laser procedure)
  - 1016 ➤ current smoker (at time of surgery)
  - 1017 ➤ lens status (phakic, posterior chamber intraocular lens)
  - 1018 ➤ Intraocular pressure (IOP) treated as a binary variable:  $< 25$  vs.  $\geq 25$  mmHg  
1019
- 1020 • Donor/graft factors
  - 1021 ➤ eye bank determined screening ECD
  - 1022 ➤ pre-operative CIARC determined ECD
  - 1023 ➤ age
  - 1024 ➤ gender
  - 1025 ➤ race
  - 1026 ➤ history of diabetes
  - 1027 ➤ cause of death
  - 1028 ➤ type of storage medium  
1029

### 1030 7.2.2.3 ECD as Time Dependent Predictor of Graft Failure

1031 The relationship between endothelial graft failure (graft failure due to endothelial  
1032 decompensation) and ECD will be addressed paralleling the methods used in the CDS. A Cox  
1033 model will be fit with ECD as a time dependant covariate. This analysis will be limited to

1034 subjects with at least one gradable follow up image. The rate of change will also be calculated as  
1035 a time dependent variable defined as the least squares slope over all previous measurements  
1036 starting at 6 months (e.g., the rate of change at one year would be the slope fit to the 6 month and  
1037 1 year ECD values). Missing values will be imputed by Rubin's method. If significant departure  
1038 from linearity is detected, then ECD will be treated as a categorical variable. The proportional  
1039 hazards assumptions will be tested as described above.

1040

1041 To check whether results are sensitive to how missing data are handled, a second model will be  
1042 fit with a time dependent indicator for missing ECD.

1043

### 1044 **7.2.3 Graft Rejection**

1045 Associations of baseline recipient and donor factors with the occurrence of a graft rejection will  
1046 be assessed in univariate and multivariate proportional hazards models. Life-table analyses will  
1047 be used to compute the probability of a first rejection event within intervals defined by the study  
1048 exam schedule. Data will be censored at the time of a non-rejection graft failure or at the last  
1049 visit.

1050

### 1051 **7.2.4 Endothelial Cell Density (ECD)**

#### 1052 **7.2.4.1 Included Subjects**

1053 The primary analysis will include all study participants with a gradable 3-year image, who have  
1054 not experienced graft failure 3 years after transplantation. Study participants with a missing cell  
1055 count at 3 years will be included in a secondary analysis using Rubin's method of multiple  
1056 imputation.

1057

#### 1058 **7.2.4.2 Outcome Measures**

1059 The primary outcome will be the ECD at 3 years, conditional on graft survival at 3 years. All  
1060 other ECD measurements during follow up will be considered as a secondary outcome.

1061

#### 1062 **7.2.4.3 Descriptive Statistics**

- 1063 • Summary statistics (mean  $\pm$  SD and/or median/quartiles as appropriate to the distribution)  
1064 will be given for the ECD by the 2 treatment groups ( $\leq 7$  and 8 to 14 days) and 4 treatment  
1065 groups (0 – 4, 5 – 7, 8 – 11, and 12 – 14 days).
- 1066 • Change from eye bank determined screening ECD will be summarized in a similar manner.
- 1067 • Boxplots of ECD and change from eye bank determined screening ECD will be given for the  
1068 2 randomization groups.
- 1069 • A scatter plot will be constructed of eye bank determined screening ECD vs. 3 year ECD  
1070 with a symbol used to denote the two randomization groups.

1071

#### 1072 **7.2.4.4 Primary Analysis**

1073 The primary analysis will be limited to subjects with gradable 3 year images, who have not  
1074 experienced graft failure 3 years after transplantation. An ANCOVA model with 3 year ECD as  
1075 the dependent variable adjusting for eye-bank-determined screening ECD will be used to assess  
1076 the effect of preservation time. The time from preservation to surgery will be treated as a binary

1077 variable. If residual values from the models above are highly skewed then a transformation (e.g.,  
1078 square root or logarithm) or non-parametric methods will be used instead.

- 1079 • Random effects will be modeled to account for any correlated data from the same donor and  
1080 any correlated data from 2 study eyes of the same study participant.
- 1081 • Additional ANCOVA models will also adjust for other recipient/donor risk factors, (if  $p <$   
1082 0.05. Random surgeon effects will also be explored using a mixed effects model.

1083

#### 1084 **7.2.4.5 Secondary Analyses**

##### 1085 **7.2.4.5.1 Sensitivity Analysis**

1086 Sensitivity analysis will also be performed to check whether results change meaningfully  
1087 depending on how missing data are handled. The missing 3 year ECD values for subjects with  
1088 surviving grafts at 3 years will be imputed and included in an analysis as described in the  
1089 previous section. The data imputation will be performed by using Rubin's method of multiple  
1090 imputation.

1091

1092

##### 1093 **7.2.4.5.2 Analysis with donor tissue preservation time as continuous/multi-categorical** 1094 **variable**

1095 The analyses described above will be repeated with time from preservation to surgery treated as  
1096 continuous (using time of day to calculate hours from preservation to surgery) or multi-category  
1097 variable (0 – 4, 5 – 7, 8 – 11, and 12 – 14 days from preservation to surgery) in separate models.

1098

##### 1099 **7.2.4.5.3 Longitudinal analysis**

1100 This analysis also will be limited to subjects with a surviving graft at 3 years. A repeated  
1101 measures least squares regression model will be fit using all available images at baseline, 6  
1102 months, 1, 2, and 3 years. This analysis will be performed *with* and *without* imputation of  
1103 missing data. Rubin's method of data imputation will be used to impute the ECD values for all  
1104 missing time points. The time from preservation to surgery will be modeled as both continuous  
1105 and categorical as described above. If residual values have a skewed distribution then  
1106 transformation (e.g., square root or logarithm) or non-parametric analysis will be used.

1107

#### 1108 **7.2.5 Course of Cornea Changes After Endothelial Keratoplasty**

1109 The association of donor, operative and postoperative related factors with ECD will be evaluated  
1110 and assessed in univariate and multivariate ANCOVA models , adjusting for the reading center  
1111 grading of pre-operative ECD (imaged post-cut if the eye bank was performing the cutting and  
1112 imaged just prior to shipping if the surgeon was performing the cutting). This ECD value will be  
1113 considered the baseline for these analyses.

1114

#### 1115 **7.2.6 Safety Analysis Plan**

1116 The main safety analysis will involve tabulation of data by treatment group of events that could  
1117 be considered possibly related to the preservation time such as post-op infection. The efficacy  
1118 analyses related to graft failure, corneal thickness, and ECDs also could be viewed as safety  
1119 analyses. Operative and post-operative complications will also be tabulated.

1120  
1121  
1122  
1123  
1124  
1125  
1126  
1127  
1128  
1129  
1130  
1131  
1132  
1133  
1134  
1135  
1136  
1137  
1138  
1139  
1140  
1141  
1142  
1143  
1144  
1145  
1146  
1147  
1148  
1149  
1150  
1151  
1152  
1153  
1154  
1155

Further details of the analytic approach will be provided in the detailed statistical analysis plan.

**7.2.7 Additional Tabulations and Analyses**

The following will be tabulated according to treatment group:

- Baseline demographic and clinical characteristics
- Visit completion rate for each visit
- Protocol deviations

**7.2.8 DSMC Interim Analysis Plan**

No formal interim analyses are planned towards demonstrating non-inferiority before the end of the study since the recruitment period is planned to be short compared with the follow-up period and since we believe it is imperative to have three years of follow up to assess non-inferiority.

In addition to semi-annual review described in Section 5.2, the following plan for interim monitoring for a potential recommendation of early stopping of enrollment has been established in conjunction with the DSMC. This plan is based on early donor failure rate and on the progress of recruitment.

- Rate of failure within the first 8 weeks: Upon enrollment of the first 100 eyes, and then quarterly thereafter (i.e., one review between each DSMC semi-annual meeting) the DMAC will evaluate the failure rate within the first 8 weeks (i.e. both the early failures and the primary donor failures, as defined in Section 4.6) in each group and notify the DSMC who will have the option of requesting additional information between the semi-annual reviews. The DSMC may also request more frequent reviews at any time.
- Recruitment Progress: Recruitment progress will be evaluated at the first two DSMC meetings following initiation of recruitment. If based on the current recruitment total and recruitment trend over the previous 3 months, the projected timeline for the remaining recruitment is more than 16 months at the 1<sup>st</sup> review or more than 12 months at the 2<sup>nd</sup> review, the DSMC will discuss whether the study timeline can be met.

Following each DSMC data review, a summary will be provided to the IRBs.

## REFERENCES

- 1156  
1157  
1158  
1159 1. Eye Bank Association of America. 2010 Eye Banking Statistical Report. 2010.  
1160 2. EBAA Regulatory Alert. EBAA Comments on the U.S. Food and Drug Administration  
1161 (FDA) Draft Guidance for Industry, (2009).  
1162 3. Guidance for Industry. Use of Nucleic acid tests to reduct the risk of transmission of West  
1163 Nile Virus from donors of whole blood and blood components intended for transfusion and  
1164 donors of human cells, tissues, and cellular and tissue-based products, (2008).  
1165 4. Lee WB, Jacobs DS, Musch DC, Kaufman SC, Reinhart WJ, Shtein RM. Descemet's  
1166 stripping endothelial keratoplasty: safety and outcomes: a report by the American Academy  
1167 of Ophthalmology. *Ophthalmology*. 2009;116(9):1818-30.  
1168 5. Gal RL, Dontchev M, Beck RW, Mannis MJ, Holland EJ, Kollman C, et al. The effect of  
1169 donor age on corneal transplantation outcome results of the cornea donor study.  
1170 *Ophthalmology*. 2008;115(4):620-6.  
1171 6. Armour RL, Ousley PJ, Wall J, Hoar K, Stoeger C, Terry MA. Endothelial keratoplasty  
1172 using donor tissue not suitable for full-thickness penetrating keratoplasty. *Cornea*.  
1173 2007;26(5):515-9.  
1174 7. Chang SD, Pecego JG, Zadnik K, Danneffel MB, Mutti DO, Mannis MJ. Factors influencing  
1175 graft clarity. *Cornea*. 1996;15:577-81.  
1176 8. Abbott RL, Forster RK. Determinants of graft clarity in penetrating keratoplasty. *Arch*  
1177 *Ophthalmol*. 1979;97(6):1071-5.  
1178 9. Wagoner MD, Gonnah el S. Corneal graft survival after prolonged storage in Optisol-GS.  
1179 *Cornea*. 2005;24(8):976-9.  
1180 10. Doganay S, Hepsen IF, Yologlu S, Demirtas H. Effect of the preservation-to-surgery interval  
1181 on corneal allograft survival in low-risk patients. *Ophthalmic Surg Lasers Imaging*.  
1182 2007;38(6):457-61.  
1183 11. Sugar A, Gal RL, Beck W, Ruedy KJ, Blanton CL, Feder RS, et al. Baseline donor  
1184 characteristics in the Cornea Donor Study. *Cornea*. 2005;24(4):389-96.  
1185 12. Guttman C. Donor Death-Surgery Interval May Affect DSAEK Outcomes. *Ophthalmology*  
1186 *Times*. April 15, 2009.  
1187 13. Price MO, Price FW, Jr. Endothelial cell loss after descemet stripping with endothelial  
1188 keratoplasty influencing factors and 2-year trend. *Ophthalmology*. 2008;115(5):857-65.  
1189 14. Chen ES, Terry MA, Shamie N, Hoar KL, Friend DJ. Precut Tissue in Descemet's Stripping  
1190 Automated Endothelial Keratoplasty Donor Characteristics and Early Postoperative  
1191 Complications. *Ophthalmology*. 2008.  
1192 15. Terry MA, Chen ES, Shamie N, Hoar KL, Friend DJ. Endothelial cell loss after Descemet's  
1193 stripping endothelial keratoplasty in a large prospective series. *Ophthalmology*.  
1194 2008;115(3):488-96 e3.  
1195 16. Terry MA. Precut tissue for descemet stripping automated endothelial keratoplasty:  
1196 complications are from technique, not tissue. *Cornea*. 2008;27(6):627-9.  
1197 17. Terry MA, Shamie N, Straiko MD, Friend DF. Endothelial keratoplasty: The relationship  
1198 between donor tissue storage time and donor endothelial survival. *Ophthalmology*.  
1199 2011;118:36-40.  
1200 18. Louttit MD, Kopplin LJ, Igo, Jr RP, Fondran JR, Tagliaferri A, Bardenstein D, Aldave AJ,  
1201 Croasdale CR, Price M, Rosenwasser GO, Lass JH, Iyengar SK: A multi-center study to map



1202 genes for Fuchs' Endothelial Corneal Dystrophy: Baseline Characteristics and Heritability.  
1203 Cornea In press

1204 19. Eye Bank Association of America. Medical Standards. Washington, DC; 2009  
1205 20. Eye Bank Association of America. Procedures Manual. Washington, DC; 2009  
1206 21. Collaborative Corneal Transplantation Studies Research Group. The collaborative corneal  
1207 transplantation studies (CCTS). Effectiveness of histocompatibility matching in high-risk  
1208 corneal transplantation. The Collaborative Corneal Transplantation Studies Research Group.  
1209 Arch Ophthalmol. 1992;110(10):1392-403.

1210 22. Maguire MG, Stark WJ, Gottsch JD, Stulting RD, Sugar A, Fink NE, et al. Risk factors for  
1211 corneal graft failure and rejection in the collaborative corneal transplantation studies.  
1212 Collaborative Corneal Transplantation Studies Research Group. Ophthalmology.  
1213 1994;101(9):1536-47.

1214 23. Jordan C, Price M, et al. Graft rejection episodes after Descemet stripping with endothelial  
1215 keratoplasty: part one: clinical signs and symptoms. Br J Ophthalmol 2009: 387-390.  
1216  
1217  
1218  
1219

**APPENDIX A**

**PROTOCOL AMENDMENT #1**

**EXTENSION OF FOLLOW-UP TO COMMON END DATE**

**July 1, 2015**

1220  
1221  
1222  
1223  
1224  
1225  
1226  
1227  
1228

1229 **1. Overview: Extension of follow-up after 3 years.**

1230 Participants who re-consent to additional follow-up will continue annual protocol visits  
1231 past the 3-year time point, until at least 2017. The same data will be captured from annual visits  
1232 as well as interim unscheduled visits as was done previously. The same study specific tests –  
1233 pachymetry and specular/confocal microscopy - will continue to be performed at the annual  
1234 visits. Visits will continue to be captured until approximately the 2<sup>nd</sup> quarter of 2017, therefore  
1235 all participants will have a last possible common endpoint rather than exiting individually when  
1236 they reach their 3 year post-operative visit.

1237 *Rationale: Continued follow-up of CPTS participants provides an excellent opportunity to*  
1238 *gain more information about many factors affecting DSAEK outcomes, including donor age*  
1239 *and preservation time. This additional longitudinal data will provide important information*  
1240 *on longer term DSAEK outcomes that are not necessarily impacted by preservation time,*  
1241 *although we will continue to assess that variable as well.*

1242

1243

1244 **2. Eligibility and Informed Consent**

1245 **a. Eligibility**

1246 All active study participants will be eligible for extended follow-up to a common end date, until  
1247 at least 2017. The exact end date will be determined by the Operations Committee based on  
1248 funding and data analysis requirements.

1249 **b. Informed Consent**

1250 Active study participants will be asked to sign a new informed consent form or addendum prior  
1251 to the post-3 year visits or as soon thereafter as feasible. The new informed consent form (or  
1252 addendum) may be signed during the next scheduled visit (either Protocol Visit or Unspecified  
1253 Visit) or by mail if the governing IRB approves that process. Until the new informed consent  
1254 form or addendum is signed, the study participant will not be examined post-3 year for study  
1255 purposes. If the new informed consent form or addendum is not signed, follow-up for that  
1256 participant will end upon completion of the 36-month visit.

1257 **3. Follow-Up Visits**

1258

1259 **a. Visit Schedule and Windows**

1260 The post-3 year visit schedule will vary by the participant's enrollment date. Some participants  
1261 will be eligible for Year 4 and Year 5 visits if the windows below fall within the extended  
1262 follow-up period.

1263

1264 Additional protocol-specified follow-up visits (and visit windows) for the first eye, will be as  
1265 follows:

1266 • 48 months (44 - 52 months)

1267 • 60 months (56 – 64 months)

1268 Additional visits may be performed more often as needed. A data form will be completed for  
 1269 each protocol visit and any non-protocol visits where the intent of the visit was to examine the  
 1270 study eye by a study investigator. Additional non-protocol visits by non-study investigators may  
 1271 also be uploaded by the clinical site to the study website, as was done during the initial 3-year  
 1272 follow-up phase. For example, if graft failure is determined and a regrant is required on a non-  
 1273 protocol visit, the appropriate follow-up visit form and graft failure form should be completed if  
 1274 and when this occurs.

1275 If the second eye of an active participant was enrolled, a modified visit schedule will be  
 1276 allowed to minimize return visits for participants that had bilateral EK as part of the study. For  
 1277 example, sites will be allowed to follow standard of care practices to avoid unnecessary visits  
 1278 linked to targeting each eye within its respective windows as listed above. Sites are encouraged  
 1279 to schedule both eyes within their respective windows when the windows overlap, but at  
 1280 minimum at least one eye must be within its target visit window at each visit.

1281  
 1282 **b. Testing Procedures**

1283 The Table below shows the key elements of data collection at each study visit. Additional  
 1284 visits may occur as needed for the usual care of the participant.

1285

|                                                    | 48<br>Months | 60<br>Months |
|----------------------------------------------------|--------------|--------------|
| <b>Parameters</b>                                  |              |              |
| Medication History                                 | X            | X            |
| Slit lamp examination                              | X            | X            |
| Intraocular pressure                               | X            | X            |
| Ultrasonic pachymetry                              | X            | X            |
| Endothelial imaging                                | X            | X            |
| Post-op complications and other<br>untoward events | X            | X            |

1286  
 1287  
 1288  
 1289  
 1290  
 1291  
 1292  
 1293  
 1294  
 1295  
 1296

1297 **c. Detailed Testing Procedures**

1298 Procedures for testing at each follow-up visit are identical as listed in Chapter 4.

1299

1300 **d. Adverse Events**

1301 Adverse event reporting remains identical to Chapter 5.

1302

1303 **e. Other Considerations in Follow-up**

1304 All other retention and follow-up procedures including central contract from the

1305

Coordinating Center will continue as in the original study and as outlined in Chapter 6.

1306  
1307  
1308  
1309  
1310  
1311  
1312  
1313  
1314  
1315  
1316  
1317  
1318  
1319  
1320  
1321

**4. Statistical Analyses**

The statistical methods for all 3 study objectives completed up to the 3 year primary endpoint will be extended to the 4 and 5 year endpoints. Additional analyses on the impact of missing data will be evaluated, including comparison of baseline characteristics for those who agreed versus declined to consent to continue .

1  
2  
3  
4  
5  
6  
7  
8  
9

# **CPTS Statistical Analysis Plan**

**Version: 4.0**

**Date: 6-21-16**

In sync with Protocol Version 4.0

10

11

12

## Version History

| Version Number | Author        | Approver      | Effective Date | Revision Description                                                                                                                                                                                                                                                                                                                                                                                                                                                      |
|----------------|---------------|---------------|----------------|---------------------------------------------------------------------------------------------------------------------------------------------------------------------------------------------------------------------------------------------------------------------------------------------------------------------------------------------------------------------------------------------------------------------------------------------------------------------------|
| 1.0            | Allison Ayala | Craig Kollman | 9-4-14         | Revisions prior to 9-4-14 were not versioned according to new JCHR standards. Changes were clarifications from DSMC meetings and were documented in DSMC meeting minutes.                                                                                                                                                                                                                                                                                                 |
| 2.0            | Allison Ayala | Craig Kollman | 8-12-15        | Added analyses related to extension of CPTS to capture 4 and 5 year visits, which was incorporated into protocol version 4.0.                                                                                                                                                                                                                                                                                                                                             |
| 3.0            | Allison Ayala | Craig Kollman | 1-15-16        | The DSMC, OC, and EC approved the clarification of how to handle cases that were cloudy at the 3 year visit. Details of the original discussion are in the November 3, 2015 DSMC minutes and details of the discussion/proposal that followed (and final decision) are in the following folder: <a href="#">Analysis Notes to Save\3 year failure cutoff discussions</a>                                                                                                  |
| 4.0            | Allison Ayala | Craig Kollman | 6-21-16        | <ol style="list-style-type: none"> <li>1. Clarify that “surgical trauma” (like blunt and penetrating trauma) is also a severe event, if leading to failure, that is unrelated to PT and should be censored prior to the event.</li> <li>2. Clarify that out of window 3 year visits can be used up to 44 months for determining 3 year failures. Decision/discussion saved in the following folder: <a href="#">Analysis Notes to Save\3 year visit window</a></li> </ol> |

13



# CPTS Statistical Analysis Plan

## 1.0 Study Objectives

The objectives of the “Effect of Corneal Preservation Time on Long-Term Graft Success” (CPTS) study are:

Objective 1 (Primary Objective): To determine if the 3-year graft failure rate following EK performed with donor corneas with a preservation time of 8 to 14 days is non-inferior to the failure rate when donor corneas with a preservation time of 7 or fewer days are used.

Objective 2: To determine if the central corneal endothelial cell density 3-years after EK is related to preservation time.

Objective 3: To evaluate the effect of donor, operative and postoperative factors on graft failure and endothelial cell density three years following EK.

The purpose of this document is to describe the analysis plan for these 3 objectives, as well as some pre-planned secondary analyses. There may be additional secondary analyses performed that are not described in this document.

## 2.0 Sample Size

The sample size of 1330 is calculated based on a non-inferiority (a single one-sided test) design with the goal to determine that the graft failure rate of the recipients of donor tissue transplanted 8 to 14 days after preservation is not worse than the graft failure rate of recipients of donor tissue transplanted  $\leq 7$  days after preservation.

| Non-Inferiority Limit | Power = 90 % |      |                  |             |      |
|-----------------------|--------------|------|------------------|-------------|------|
|                       | Failure Rate |      |                  |             |      |
|                       | 12 %         | 10 % | 8 % <sup>a</sup> | 6 %         | 4 %  |
| 10 %                  | 362          | 310  |                  |             |      |
| 8 %                   | 566          | 482  | 394              |             |      |
| 6 %                   | 1006         | 858  | 702              | 538         |      |
| 4 %                   | 2262         | 1928 | 1576             | <b>1208</b> | 824  |
| 2 %                   | 9044         | 7708 | 6304             | 4832        | 3290 |

Note: Numbers in table are total sample size for both treatment groups combined (crossover and lost to follow up are not accounted for). Half would be randomized to each group.

<sup>a</sup> CDS data: 3-year failure rate

In the Cornea Donor Study (CDS), the 3-year failure rate was 8%. Clinical expectations suggest that the graft failure rate from the EK procedure will be smaller than the failure rate from the PKP procedure that was used in CDS; therefore, a 3-year failure rate of 6% has been assumed. Based on equal allocation of recipients to each group and type I error of 5%, a sample size of 1208 will provide 90% power for a non-inferiority limit of 4%. Based on information from the CDS, approximately 10% of subjects will have incomplete follow up (due to death, withdrawal or lost to follow up) by the end of year 3. Increasing the calculated sample size by this amount gives a total of 1330 subjects (665 per group).

- The inclusion of participants with two study eyes, one in each treatment group, will tend to reduce the variance and as a result increase statistical power. To be conservative, this has not

55 been accounted for in the sample size estimation, since the correlation of outcome with two  
56 eyes is not known.  
57  
58

### 59 **3.0 Graft Failure (Primary Outcome)**

#### 60 **3.1 Primary Analysis of 3 Year Graft Failure - (*Analysis plan for objective 1*)**

##### 61 **3.1.1 Formal Statistical Hypothesis**

62 The primary objective of the study is to determine if the 3-year graft failure rate  
63 following EK performed with donor corneas with a preservation time of 8 to 14 days  
64 is non-inferior to the failure rate when donor corneas with a preservation time of 7 or  
65 fewer days are used. In terms of formal statistical hypothesis testing, the null and  
66 alternative hypotheses are:  
67  
68

$$69 \text{Ho: } p_{8-14} - p_{0-7} \geq 4\%$$

$$70 \text{Ha: } p_{8-14} - p_{0-7} < 4\%$$

71  
72 where  $p_{8-14}$  and  $p_{0-7}$  is the probability of graft failure by 3 years in the 8-14 day group  
73 and the  $\leq 7$  day group, respectively.  
74

##### 75 **3.1.2 Analysis Cohort**

76 Participant study eyes that did not have surgery, received a non-study donor, had an  
77 AC IOL implanted during surgery, or experienced a suprachoroidal hemorrhage will  
78 be excluded from the primary analysis. It is highly unlikely these events could be  
79 related to preservation time, thus inclusion of them could actually bias *towards*  
80 concluding non-inferiority. Therefore, the primary analysis will deviate from the  
81 principle of intent-to-treat, but this approach is conservative for a non-inferiority  
82 analysis.  
83  
84

##### 85 **3.1.2.1 Censoring of Data for Occurrence of a Severe Event Unrelated to 86 Preservation Time**

87 In order to minimize bias towards concluding non-inferiority, severe events  
88 not expected to be related to preservation time will be censored at the last  
89 examination prior to the occurrence of the event that severely impacts the study  
90 eye, if the eye was not on the path to failure at the last visit prior to the  
91 occurrence of the severe unrelated event (see 3.1.5 for the 'rules'). These  
92 events include:

- 93     ▪ Enucleation (eye will be dropped)
- 94     ▪ Phthisis (eye will be dropped)
- 95     ▪ Failure due to surgical (unrelated to the initial DSEK), blunt or  
96     penetrating trauma (eye will be followed until failure criteria met)

##### 97 **3.1.2.2 Analyzing Preservation Time Group Crossovers As-Treated**

98 If a study eye receives a study donor cornea in the wrong preservation time  
99 group, it will be analyzed as treated, as this will minimize bias towards  
100 concluding non-inferiority. A secondary intent-to-treat analysis will also be  
101 completed if this occurs.  
102  
103

104  
105 **3.1.3 Definition of Graft Failure (per protocol, section 4.7):**

106 Graft failure will be assessed and defined as the occurrence of one of the following:

- 107
- Cornea which requires regrafting for any reason
  - Cornea which remains cloudy without clearing, according to the following:
    - 109 (1) cloudy cornea on the first postoperative day which does not clear
    - 110 within 8 weeks
    - 111 OR
    - 112 (2) cloudy cornea which was initially clear postoperatively but becomes
    - 113 and remains cloudy for 3 months without clearing.

114 *Note: graft failure is based on cloudy recipient stroma. Any reference to*  
115 *cloudy cornea when defining graft failure is with regard to the recipient*  
116 *stromal clarity.*

117 For eyes meeting the definition of graft failure above, the principal cause of graft  
118 failure will be classified as one of the following:

- 119
- Early failure (cloudy or equivocal recipient cornea on the first postoperative  
120 day which does not clear or requires a regraft within 8 weeks), associated  
121 with surgical complications, including immediate peri-operative  
122 complications such as acute angle closure noted on the 1 day post-operative  
123 visit
  - Primary donor failure (cloudy or equivocal recipient cornea on the first  
124 postoperative day which does not clear or requires a regraft within 8 weeks),  
125 in the absence of surgical complications
  - Graft rejection (defined as a clouded recipient central stroma following an  
126 allograft reaction);
  - Non-rejection graft failure (defined as a graft that initially had a clear central  
127 recipient stroma and becomes cloudy due to causes other than an immune  
128 event. These include: surface failure, infection, glaucoma/hypotony,  
129 endothelial decompensation, interface irregularity or opacity, pre-existing  
130 stromal scarring, blunt or penetrating trauma, and other causes);
  - Refractive/visual graft failure (defined as a graft that requires regrafting due  
131 to inadequate vision while the recipient central stroma remains clear).

132  
133  
134  
135  
136  
137 **3.1.4 Definition of Graft Failure Date**

138 A cornea that is “on the path to failure” means the cornea has met criteria to initiate  
139 the path to failure and it has not been removed from that path, defined as follows:

- 140 1. Definition of how to initiate “on the path to failure” :
- Initiating At 1 Day Visit: A cornea may be classified as either cloudy ***or***  
142 equivocally cloudy to start a count of how many days “on the path to  
143 failure”.
  - Initiating After 1 Day Visit: A cornea must be initially classified as cloudy  
144 to start a count of how many days “on the path to failure”.
- 145 2. A cornea classified as equivocal after the “on the path to failure” count begins is  
146 still considered “on the path to failure.”
- 147 3. A cornea classified as clear after the “on the path to failure” count begins is no  
148 longer “on the path to failure”; the count restarts the next time the cornea is  
149 classified as cloudy.
- 150

151 The date of graft failure is defined as follows

152

- 153 1. If “on the path to failure” (per 3.1.4 above) initiates at the 1 Day Visit:  
 154 a. If the cornea remains “on the path to failure” (per 3.1.4 above), is  
 155 classified cloudy at least once during those consecutive visits, and is  
 156 classified cloudy at least 56 days after surgery date, then the cornea meets  
 157 the failure definition and the date of failure will be the date of the 1 day  
 158 visit. (Note: this means it must be classified cloudy at least twice during  
 159 the path to failure, and at least one of those  $\geq 56$  days after surgery)  
 160 b. If the cornea remains “on the path to failure” (per 3.1.4 above) and a  
 161 regrant occurs within 56 days or after 56 days (but prior to being classified  
 162 cloudy after 56 days), the date of failure will equal the date of the 1 day  
 163 visit.  
 164 2. If “on the path to failure” (per 3.1.4 above) initiates after the 1 Day Visit:  
 165 a. If a cornea is classified as cloudy, remains “on the path to failure” (per  
 166 3.1.4 above), and is classified cloudy at least 90 days after the initial  
 167 cloudy classification, then the cornea meets the failure definition and the  
 168 date of failure will be the first date at which cornea is indicated as cloudy.  
 169 b. If a cornea is “on the path to failure” (per 3.1.4 above) for  $<90$  days and a  
 170 regrant occurs, the date of failure will equal the first exam date where the  
 171 cornea is cloudy.  
 172 3. If a cornea is clear and then a regrant occurs, the date of failure will be equal to  
 173 the date of regrant.

174 Examples

175 Example 1  
 176 equivocal (1 day) ← failure date  
 177 equivocal  
 178 cloudy ( $>56$  days after surgery)  
 179 cloudy (need the second cloudy to confirm)  
 180  
 181

182 Example 2  
 183 equivocal (1 day) ← failure date  
 184 equivocal  
 185 regrant  
 186

187 Example 3  
 188 clear  
 189 equivocal  
 190 cloudy\* ← failure date  
 191 equivocal  
 192 cloudy ( $>90$  days after \*)  
 193  
 194

195 Example 4  
 196 clear  
 197 cloudy  
 198 clear  
 199 cloudy\* ← failure date  
 200 cloudy ( $<90$  days after \*)  
 201 regrant  
 202

203 Example 5  
 204 clear  
 205 clear  
 206 regrant ← failure date  
 207

208  
209  
210  
211  
212  
213  
214  
215  
216  
217  
218  
219  
220  
221  
222  
223  
224  
  
225  
226  
227  
228  
229  
230  
231  
232  
233  
234  
235  
236  
237  
238  
239  
240  
241  
242  
243  
244  
245  
246  
247  
248  
249  
250  
251  
252  
253  
254  
255  
256

### 3.1.5 Censoring and Non-Protocol Graft Failures

#### 3.1.5.1 Eyes with Incomplete Follow-Up

In eyes that dropped prior to the 3 year visit without meeting criteria for graft failure the following ‘rules’ will apply:

1. A cornea that is “on the path to failure” (per 3.1.4 above) at the last completed visit AND was cloudy at least once during the “on the path to failure” period will be flagged for **‘non-protocol’ graft failure review by the Executive Committee**. If confirmed as a non-protocol graft failure, the failure date will be determined as it is in 3.1.4 above.
2. All others *will NOT* be considered a graft failure and the data will be **censored** at the last completed visit

#### 3.1.5.2 Eyes with 3 Year Visit Not Meeting Failure Criteria

In eyes that complete the 3 year visit without meeting criteria for graft failure the following ‘rules’ will apply:

1. If the cornea is “on the path to failure” (per 3.1.4 above) at the 3 year visit, data beyond the 3 year visit up to 42 months will be used (if available) to determine whether the cornea will be considered a failure up to 3 years. Data beyond 42 months will not be used for this assessment.
  - If the cornea clears at a subsequent follow-up visit (within 42 months) prior to meeting confirmation of failure criteria, the cornea will not be classified as a graft failure and data will be censored at the 3 year visit.
  - If additional follow-up data (within 42 months) confirm a failure (via regrant or 90 days confirmed cloudy), then the cornea will be classified as a graft failure up to 3 years and date of failure will be determined per 3.1.4 above.
  - If data beyond the 3 year visit are not available, OR the cornea remains “on the path to failure” beyond the 3 year visit but the follow-up data that are available within 42 months still do not confirm failure, the case will be flagged for **‘non-protocol’ graft failure review by the Executive Committee**. (Note all of these cases will have been cloudy at least once during the “on the path to failure” period.) If confirmed as a non-protocol graft failure, the failure date will be determined per 3.1.4 above.
2. If the cornea is not “on the path to failure” (clear or equivocal following clear) at the 3 year visit, it *will NOT* be considered a graft failure and the data will be **censored** at the 3 year visit

#### 3.1.5.3 Severe Events Unrelated to Preservation Time

In eyes that met failure due to a severe event unrelated to preservation time (listed in section 3.1.2.1), the following ‘rules’ will apply:

1. A cornea that is “on the path to failure” (per 3.1.4 above) at the last completed visit prior to the severe event leading to failure AND was cloudy at least once during that “on the path to failure” period prior to

257 the event will be flagged for **‘non-protocol’ graft failure review by**  
 258 **the Executive Committee.** If confirmed as a non-protocol graft  
 259 failure, the failure date will be determined as it is in 3.1.4 above.  
 260 2. All others *will NOT* be considered a graft failure and the data will be  
 261 **censored** at the last completed visit prior to the severe event leading  
 262 to failure.

263 Examples

264 Example 1  
 265 clear  
 266 clear  
 267 cloudy ← ‘non-protocol’ failure date  
 268 equivocal  
 269 lost to followup

270  
 271 Example 2  
 272 clear  
 273 clear  
 274 equivocal  
 275 equivocal ← censored date  
 276 lost to followup

277  
 278 Example 3  
 279 clear  
 280 clear  
 281 cloudy ← ‘non-protocol’ failure date  
 282 blunt trauma  
 283 cloudy  
 284 regraft

285  
 286 Example 4  
 287 clear  
 288 cloudy  
 289 clear ← censored date  
 290 blunt trauma  
 291 cloudy  
 292 regraft

293  
 294 Example 5  
 295 equivocal (1 day)  
 296 equivocal ← censored date  
 297 lost to followup

298  
 299  
 300 Example 6  
 301 equivocal (1 day) ← ‘non-protocol’ failure date  
 302 cloudy  
 303 lost to followup

304  
 305 **3.1.6 Clarifications Regarding 3 Year Visit Windows**

306 The visit that the site designates as the “3 year visit” is the one that drives whether a 3  
 307 year failure has occurred. If the eye is dropped without meeting failure and prior to  
 308 completion of the 3 year visit, the rules in 3.1.5.1 apply. If failure definition is met  
 309 prior to a 3 year visit, then this is counted as a 3 year failure according to 3.1.4. If  
 310 failure is not met prior to a 3 year visit, the rules in 3.1.5.2 are followed. The following  
 311 clarifications regarding visit windows will apply to these rules:  
 312

- The window for the 3 year visit, per protocol, is 35-42 months. The 3 year visit will be permitted to occur late out of window, up to 44 months. For a 3 year visit occurring late out of window (between 42-44 months) the same rules above apply relative to this designated 3 year visit.
- If there is no designated 3 year visit completed, data (i.e. unspecified visits) up to 44 months can be used to determine if failure met. The same rules above will apply.
- NOTE: This means that data beyond 42 months (up to 44 months) CAN be used to determine 3 year failure status if and only if the visits occur prior to or including a designated 3 year visit late out of window, OR in the absence of a designated 3 year visit.

### 3.1.7 Unadjusted Analysis

Three year Kaplan-Meier graft failure estimates with 95% confidence intervals (variance estimated using the Greenwood method) will be calculated separately for the two treatment groups ( $\leq 7$  days and 8 to 14 days from preservation to surgery). A one-sided 95% confidence interval will be constructed for the difference in 3 year graft failure rates between the two groups. The bootstrap re-sampling technique will be used to account for potentially correlated data from donors who donated both corneas in this study and potentially correlated data from 2 study eyes of the same study participant. The technique will sample with replacement from the observed dataset. For each bootstrap sample the effect of preservation time will be estimated using the same method as in the primary analysis. Confidence intervals will be calculated using the bias-corrected and accelerated method. The number of bootstraps will be 100,000.

The two treatment groups will be declared equivalent if the one-sided 95% confidence interval for the difference in proportions excludes the pre-defined non-inferiority limit of 4%.

### 3.1.8 Adjusted Analysis

Multivariate analysis will be performed using Cox proportional hazards regression model. The primary multivariate model will include the corneal diagnosis regardless of statistical significance, in addition to time from preservation to surgery (treated as a binary variable).

In additional models, potential confounders including recipient and donor age, recipient and donor race, presence of glaucoma, presence of corneal vessels, history of smoking, and certain aspects of the retrieval and processing of the donor tissue (including multiple types of storage media, if more than one is used in preservation of the corneal tissues, observations during or after cutting, time from cut to surgery, and donor rim culture results) will be screened by assessing the change in the preservation time effect when the potential confounder is controlled for in the Cox model. Univariate models will be evaluated first, and factors from those models with a p value  $< 0.10$  will then be evaluated in a multivariate model. A final model will be constructed consisting of factors with a p value  $< 0.01$  following a backwards selection process.

### 3.1.9 Surgeon Effect



363 Random surgeon effects will be tested using a generalized linear model via the SAS  
364 GLIMMIX procedure. This marginal model produces a robust standard error (RSE)  
365 by use of a sandwich estimator, which corrects for correlated data.  
366

### 367 **3.1.10 Analysis of Potential Interaction**

368 Potential effect modifiers of donor tissue preservation time such as recipient age or  
369 corneal diagnosis will be screened by including first-order interaction terms.  
370 Variables that exhibit modification of the donor tissue preservation time effect with  
371 an associated P value < 0.10 will be added to the model, and the final model will be  
372 constructed consisting of terms with a p value <0.01 following a backwards selection  
373 process.  
374

## 375 **3.2 Secondary Analyses of 3 Year Graft Failure**

### 376 **3.2.1 Preservation Time**

377 The time from preservation to surgery is treated as a binary variable in the primary  
378 analysis (see above section). Secondary analyses will look at the time from  
379 preservation to surgery as a categorical variable with multiple levels and as a  
380 continuous variable:  
381

- 382 • Kaplan-Meier estimates of graft failure with 95% confidence interval will be  
383 calculated for each of the following groups: 0 – 4, 5 – 7, 8 – 11, and 12 – 14 days  
384 from preservation to surgery (counting partial days as whole days).
- 385 • A Cox proportional hazards model will be constructed treating the time from  
386 preservation to surgery as a continuous variable (using time of day to calculate  
387 hours from preservation to surgery). Polynomial terms will be added to assess any  
388 curvilinear, J, or U shaped relationship between time from preservation to surgery  
389 and graft failure. If no significant departure from a linear relation is detected, a  
390 one sided 95% confidence interval will be computed for the hazard ratio per day  
391 of time from preservation to surgery.  
392     ▪ The proportional hazards assumptions will be tested through the use of time-  
393 dependent variables with a logarithm transformation of time. If this  
394 assumption is violated then hazard ratios will be presented separately for  
395 different periods following transplant.  
396

### 397 **3.2.2 Predictive Factors – (Analysis plan for objective 3, graft failure outcome)**

398 The association of factors potentially related to graft failure will be evaluated in  
399 univariate and multivariate Cox models , adjusting for preservation time group  
400 regardless of statistical significance. The proportional hazards assumptions will be  
401 tested as described above. Univariate models will be evaluated first, and factors from  
402 those models with a p value <0.10 will then be evaluated in a multivariate model. A  
403 final model will be constructed consisting of factors with a p value <0.01 following a  
404 backwards selection process.  
405

406 Potential factors to evaluate include:

- 407 • Recipient factors
- 408     ➤ preoperative diagnosis  
409
- 410

- 411 ➤ gender
- 412 ➤ age
- 413 ➤ race
- 414 ➤ prior use of glaucoma medication
- 415 ➤ prior glaucoma surgery (trabeculectomy, laser procedure)
- 416 ➤ current smoker (at time of surgery)
- 417 ➤ lens status (phakic, posterior chamber intraocular lens)
- 418 ➤ Intraocular pressure (IOP)

- 419
- 420 • Donor/graft factors
  - 421 ➤ eye bank determined screening ECD
  - 422 ➤ pre-operative CIARC determined ECD
  - 423 ➤ age
  - 424 ➤ gender
  - 425 ➤ race
  - 426 ➤ history of diabetes
  - 427 ➤ cause of death
  - 428 ➤ type of storage medium
  - 429 ➤ death to preservation time
  - 430 ➤ surgeon cut vs eye bank cut
  - 431 ➤ postcut thickness
  - 432 ➤ cut to surgery time
  - 433 ➤ observations during or after cutting

- 434
- 435 • Surgical factors
  - 436 ➤ Insertion method
  - 437 ➤ Incision location
  - 438 ➤ Incision site
  - 439 ➤ Graft size

- 440
- 441 • Postoperative factors
  - 442 ➤ Dislocation
  - 443 ➤ Rebubbling
  - 444 ➤ IOP
  - 445 ➤ Graft rejection
  - 446 ➤ Corneal thickness

### 3.2.3 ECD as Time Dependent Predictor of Graft Failure

449 The relationship between endothelial graft failure (graft failure due to endothelial  
 450 decompensation) and ECD will be addressed paralleling the methods used in the CDS.  
 451 A Cox model will be fit with ECD as a time dependant covariate. This analysis will  
 452 be limited to subjects with at least one gradable follow up image. The rate of change  
 453 will also be calculated as a time dependent variable defined as the least squares slope  
 454 over all previous measurements starting at 6 months (e.g., the rate of change at one  
 455 year would be the slope fit to the 6 month and 1 year ECD values). Missing values  
 456 will be imputed by Rubin's method. If non-linear effects are detected, transformations  
 457 will be used. For ease of interpretation, results will be presented as discrete categories  
 458 with cutpoints chosen to display the trends identified from the transformed model. P-  
 459

460 values will still be from a continuous analysis although data are displayed as  
461 categories. The proportional hazards assumptions will be tested as described above.

462  
463 To check whether results are sensitive to how missing data are handled, a second  
464 model will be fit with a time dependent indicator for missing ECD.

### 465 466 **3.2.4 Secondary Outcome of Graft Rejection**

467 Associations of baseline recipient and donor factors with the occurrence of a graft  
468 rejection will be assessed in univariate and multivariate proportional hazards models.  
469 Life-table analyses will be used to compute the probability of a first rejection event  
470 within intervals defined by the study exam schedule. Data will be censored at the time  
471 of a non-rejection graft failure or at the last visit.

472 A Kaplan-Meier approach will be considered for evaluating probability of first graft  
473 rejection, and time dependency of repeated rejection events will also be explored.

474 Determination of the timing of a separate episode graft rejection will include a  
475 confirmation that the eye was off steroids at the visit where rejection was reported.

## 476 477 **4.0 Endothelial Cell Density (ECD)**

### 478 479 **4.1 Primary Analysis of 3 Year ECD– (*Analysis plan for objective 2*)**

#### 480 **4.1.1 Analysis Cohort**

481 The primary analysis will include all study participants with a gradable 3-year image,  
482 who have not experienced graft failure 3 years after transplantation.

#### 483 484 **4.1.2 Outcome Measure**

485 The primary outcome measure will be the ECD at 3 years, conditional on graft survival  
486 at 3 years.

#### 487 488 **4.1.3 Descriptive Statistics**

- 489 • Summary statistics (mean  $\pm$  SD and/or median/quartiles as appropriate to the  
490 distribution) will be given for the ECD by the 2 treatment groups ( $\leq 7$  and 8 to 14  
491 days) and 4 treatment groups (0 – 4, 5 – 7, 8 – 11, and 12 – 14 days).
- 492 • Change from eye bank determined screening ECD will be summarized in a similar  
493 manner.
- 494 • Boxplots of ECD and change from eye bank determined screening ECD will be  
495 given for the 2 randomization groups.
- 496 • A scatter plot will be constructed of eye bank determined screening ECD vs. 3  
497 year ECD with a symbol used to denote the two randomization groups.

#### 498 499 **4.1.4 Analysis**

500 An ANOVA model with 3 year ECD as the dependent variable will be used to assess  
501 the effect of preservation time.

- 502 • Confounding with regard to screening ECD is not expected to be an issue due to  
503 anticipated balance via randomization. Therefore, an ANCOVA model adjusting  
504 for eye-bank-determined screening ECD will only be used if this measurement is  
505 considered good enough to expect to have any impact on reducing variance.
  - 506 ○ Although all screening images are being collected, CIARC is not grading  
507 them other than a general quality assessment. CIARC will grade a sample  
508 of screening images within each eye bank. If more than 75% of the graded

ECDs are within 10% of the eye bank determined ECDs, the eye bank determined ECDs will be included in the model.

- The time from preservation to surgery will be treated as a binary variable.
- If residual values from the models above are highly skewed then a transformation (e.g., square root or logarithm) or non-parametric methods will be used instead.
- Random effects will be modeled to account for any correlated data from the same donor and any correlated data from 2 study eyes of the same study participant.
- Additional ANCOVA models will also adjust for other recipient/donor risk factors. Univariate models will be evaluated first, and factors from those models with a p value <0.10 will then be evaluated in a multivariate model. A final model will be constructed consisting of factors with a p value <0.01 following a backwards selection process
- Random surgeon effects will also be explored using a mixed effects model.
- Sensitivity analysis will also be performed to check whether results change meaningfully depending on how missing data are handled. The missing 3 year ECD values for subjects with surviving grafts at 3 years will be imputed and included in an analysis as described in the previous section. The data imputation will be performed by using Rubin's method of multiple imputation.

## 4.2 Secondary Analyses of 3 Year ECD

### 4.2.1 Preservation Time

The time from preservation to surgery is treated as a binary variable in the primary analysis of ECD (see above section). The analyses described above will be repeated with time from preservation to surgery treated as continuous (using time of day to calculate hours from preservation to surgery) or multi-category variable (0 – 4, 5 – 7, 8 – 11, and 12 – 14 days from preservation to surgery) in separate models.

### 4.2.2 Longitudinal analysis

This analysis also will be limited to subjects with a surviving graft at 3 years. A repeated measures least squares regression model will be fit using all available images at baseline, 6 months, 1, 2, and 3 years. This analysis will be performed *with* and *without* imputation of missing data. Rubin's method of data imputation will be used to impute the ECD values for all missing time points. The time from preservation to surgery will be modeled as both continuous and categorical as described above. If residual values have a skewed distribution then transformation (e.g., square root or logarithm) or non-parametric analysis will be used.

### 4.2.3 Predictive factors – (*Analysis plan for objective 3, ECD outcome*)

This analysis also will be limited to subjects with a surviving graft at 3 years. The association of factors potentially related to 3 year ECD will be evaluated in univariate and multivariate ANCOVA models, adjusting for preservation time group regardless of statistical significance, and the reading center grading of pre-operative ECD (imaged post-cut if the eye bank was performing the cutting and imaged just prior to shipping if the surgeon was performing the cutting). This ECD value will be considered the baseline for these analyses. Univariate models will be evaluated first, and factors from those models with a p value <0.10 will then be evaluated in a

556 multivariate model. A final model will be constructed consisting of factors with a p  
557 value <0.01 following a backwards selection process.

558  
559 Potential factors to evaluate include:

- 560 • Recipient factors
  - 561 ➤ preoperative diagnosis
  - 562 ➤ gender
  - 563 ➤ age
  - 564 ➤ race
  - 565 ➤ prior use of glaucoma medication
  - 566 ➤ prior glaucoma surgery (trabeculectomy, laser procedure)
  - 567 ➤ current smoker (at time of surgery)
  - 568 ➤ lens status (phakic, posterior chamber intraocular lens)
  - 569 ➤ Intraocular pressure (IOP)
- 570
- 571 • Donor/graft factors
  - 572 ➤ eye bank determined screening ECD
  - 573 ➤ pre-operative CIARC determined ECD
  - 574 ➤ age
  - 575 ➤ gender
  - 576 ➤ race
  - 577 ➤ history of diabetes
  - 578 ➤ cause of death
  - 579 ➤ type of storage medium
  - 580 ➤ death to preservation time
  - 581 ➤ surgeon cut vs eye bank cut
  - 582 ➤ postcut thickness
  - 583 ➤ cut to surgery time
  - 584 ➤ observations during or after cutting
- 585
- 586 • Surgical factors
  - 587 ➤ Insertion method
  - 588 ➤ Incision location
  - 589 ➤ Incision site
  - 590 ➤ Graft size
- 591
- 592 • Postoperative factors
  - 593 ➤ Dislocation
  - 594 ➤ Rebubbling
  - 595 ➤ IOP
  - 596 ➤ Graft rejection
  - 597 ➤ Corneal thickness
- 598
- 599

600  
601 **4.3 Effect of Preservation Time on Pre-Operative ECD – (*Secondary Non-Protocol***  
602 ***Objective*)**

603 An ANCOVA model with CIARC graded pre-operative ECD as the dependent variable,  
604 and adjusting for eye-bank-determined screening ECD, will be used to assess the effect

605 of preservation time. The time from preservation to surgery will be treated as a binary  
606 variable.  
607  
608

## 609 **5.0 Safety Analysis Plan**

610 All reported adverse events will be tabulated by treatment group. The main safety analysis will  
611 involve tabulation of data by treatment group of events that could be considered possibly related to  
612 the preservation time, including endophthalmitis, bacterial, fungal or parasitic corneal infection, or  
613 any other events designated by the study group as possibly related to preservation time.  
614

615 Operative complications and procedures, post-operative complications and procedures (including  
616 dislocation of donor, interface fluid, air injection), and abnormalities noted on ocular exam will also  
617 be tabulated by treatment group to evaluate potential safety concerns.  
618

619 The efficacy analyses already outlined in this document, related to graft failure and ECDs, also  
620 could be viewed as safety analyses. Occurrences of following additional events during follow-up  
621 will be tabulated by treatment group to assess potential safety concerns:

- 622 • IOP>25 mmHg (median and quartiles will also be presented)
  - 623 • Corneal Thickness >750 microns (median and quartiles will also be presented)
  - 624 • Definite signs of graft rejection
  - 625 • Presence of stromal corneal vessels
  - 626 • Presence of corneal scar or haze
  - 627 • Epithelial defect >50%
  - 628 • Donor stromal clarity = cloudy
  - 629 • Recipient stromal clarity = cloudy
- 630

## 631 **6.0 Additional Tabulations and Analyses**

632 The following will be tabulated according to treatment group:

- 633 • Baseline recipient demographic and clinical characteristics
  - 634 • Donor characteristics
  - 635 • Visit completion rate for each visit
  - 636 • Additional post-operative study eye procedures(not part of the safety analysis), at each visit
  - 637 • Baseline characteristics in cases with graft failure, cases with incomplete follow up without  
638 graft failure, and cases with complete follow up without graft failure.
  - 639 • Crosstabulation of immunizations or vaccinations versus signs of graft rejection, at each visit
  - 640 • Protocol deviations
- 641

## 642 **7.0 DSMC Interim Analysis Plan**

643 No formal interim analyses are planned towards demonstrating non-inferiority before the end of the  
644 study since the recruitment period is planned to be short compared with the follow-up period and  
645 since we believe it is imperative to have three years of follow up to assess non-inferiority.  
646

647 In addition to semi-annual review described in Section 5.2, the following plan for interim monitoring  
648 for a potential recommendation of early stopping of enrollment has been established in conjunction  
649 with the DSMC. This plan is based on early donor failure rate and on the progress of recruitment.

- 650 • Rate of failure within the first 8 weeks: Upon enrollment of the first 100 eyes, and then  
651 quarterly thereafter (i.e., one review between each DSMC semi-annual meeting) the DMAC



652 will evaluate the failure rate within the first 8 weeks (i.e. both the early failures and the  
 653 primary donor failures, as defined in Section 4.6) in each group and notify the DSMC who  
 654 will have the option of requesting additional information between the semi-annual reviews.  
 655 The DSMC may also request more frequent reviews at any time.

- 656 • **Recruitment Progress:** Recruitment progress will be evaluated at the first two DSMC  
 657 meetings following initiation of recruitment. If based on the current recruitment total and  
 658 recruitment trend over the previous 3 months, the projected timeline for the remaining  
 659 recruitment is more than 16 months at the 1<sup>st</sup> review or more than 12 months at the 2<sup>nd</sup> review,  
 660 the DSMC will discuss whether the study timeline can be met.  
 661

## 662 8.0 Extension Analysis Plan

### 663 8.1 Background

664 CPTS Protocol Amendment V 4.0 7-1-15 extended follow up such that participants who are  
 665 willing to re-consent will continue to be monitored for annual protocol visits past the 3-year  
 666 timepoint, until at least 2017. The same data will be captured from annual visits as well as  
 667 interim unscheduled visits as was done previously. The same study specific tests – pachymetry  
 668 and specular/confocal microscopy - will continue to be performed on the annual visits. All  
 669 participants will therefore have a last possible common endpoint rather than exiting individually  
 670 when they reach their 3 year post-operative visit; all visits will continue to be captured until  
 671 approximately the 2<sup>nd</sup> quarter of 2017.

672 ***Rationale:** Continued follow-up of CPTS participants provides an excellent opportunity to gain  
 673 more information about many factors affecting DSAEK outcomes, including donor age and  
 674 preservation time. We estimate a maximum potential of 740 and 160 Year 4 and 5 visits,  
 675 respectively, if most participants re-consent. This additional longitudinal data will provide  
 676 important information on longer term DSAEK outcomes that are not necessarily impacted by  
 677 preservation time, although we will continue to assess that variable as well.*  
 678

Actual number  
of surgeries,  
spread into  
timing of when  
they occurred

84% of enrolled  
are expected to  
reach 3 year  
90% of those  
reaching 3 year are  
expected to consent  
to CPTS extension

| Enrolled | CPTS Grant |         | Projected to reach 3 year visit | Projected to consent to CPTS extension | 4 year visit | 5 year visit |
|----------|------------|---------|---------------------------------|----------------------------------------|--------------|--------------|
| 52       | Y4         | Q2 2015 | 44                              | 39                                     |              |              |
| 183      |            | Q3 2015 | 154                             | 138                                    |              |              |
| 197      | Y5         | Q4 2015 | 165                             | 149                                    |              |              |
| 187      |            | Q1 2016 | 157                             | 141                                    |              |              |
| 232      |            | Q2 2016 | 195                             | 175                                    | 37           |              |
| 181      |            | Q3 2016 | 152                             | 137                                    | 131          |              |
| 204      | Y6         | Q4 2016 | 171                             | 154                                    | 141          |              |
| 94       |            | Q1 2017 | 79                              | 71                                     | 134          |              |
|          |            | Q2 2017 |                                 |                                        | 167          | 35           |
|          |            | Q3 2017 |                                 |                                        | 130          | 125          |

### 679 8.2 Objectives

680 The objective of the extension is to extend the 3 original study objectives to the 4 and 5 year  
 681 endpoints.  
 682



683  
684  
685  
686  
687  
688  
689  
690  
691

### **8.3 Statistical Methods**

The same statistical methods for all 3 study objectives as outlined above for analysis at 3 years will be extended to the 4 year and 5 year endpoints.

Baseline characteristics will be tabulated and compared between subjects who completed a 3 year visit and chose not to participate versus those who completed a 3 year visit and consented to participate, stratified by preservation time group. Subjects who dropped prior to the 3 year visit for any reason (regraft, death, LTF, withdrew) will be excluded from this comparison.
